# Supplementary material for: Tying Together Multiscale Calculations for Charge Transport in P3HT: Structural Descriptors, Morphology, and Tie-Chains
Source: Preprints.org preprint supplement (doi:10.20944/preprints201811.0427.v1), 2018-11-19
Supplement: Supplementary file 10 [file supplementary]

A dark blue outline of a house, consisting of a triangular roof and a rectangular base. The letters 'MDPI' are centered within the house shape.

**MDPI**
