# Supplementary figures and images for: Tying Together Multiscale Calculations for Charge Transport in P3HT: Structural Descriptors, Morphology, and Tie-Chains
Source: Preprints.org preprint supplement (doi:10.20944/preprints201811.0427.v1), 2018-11-19

a

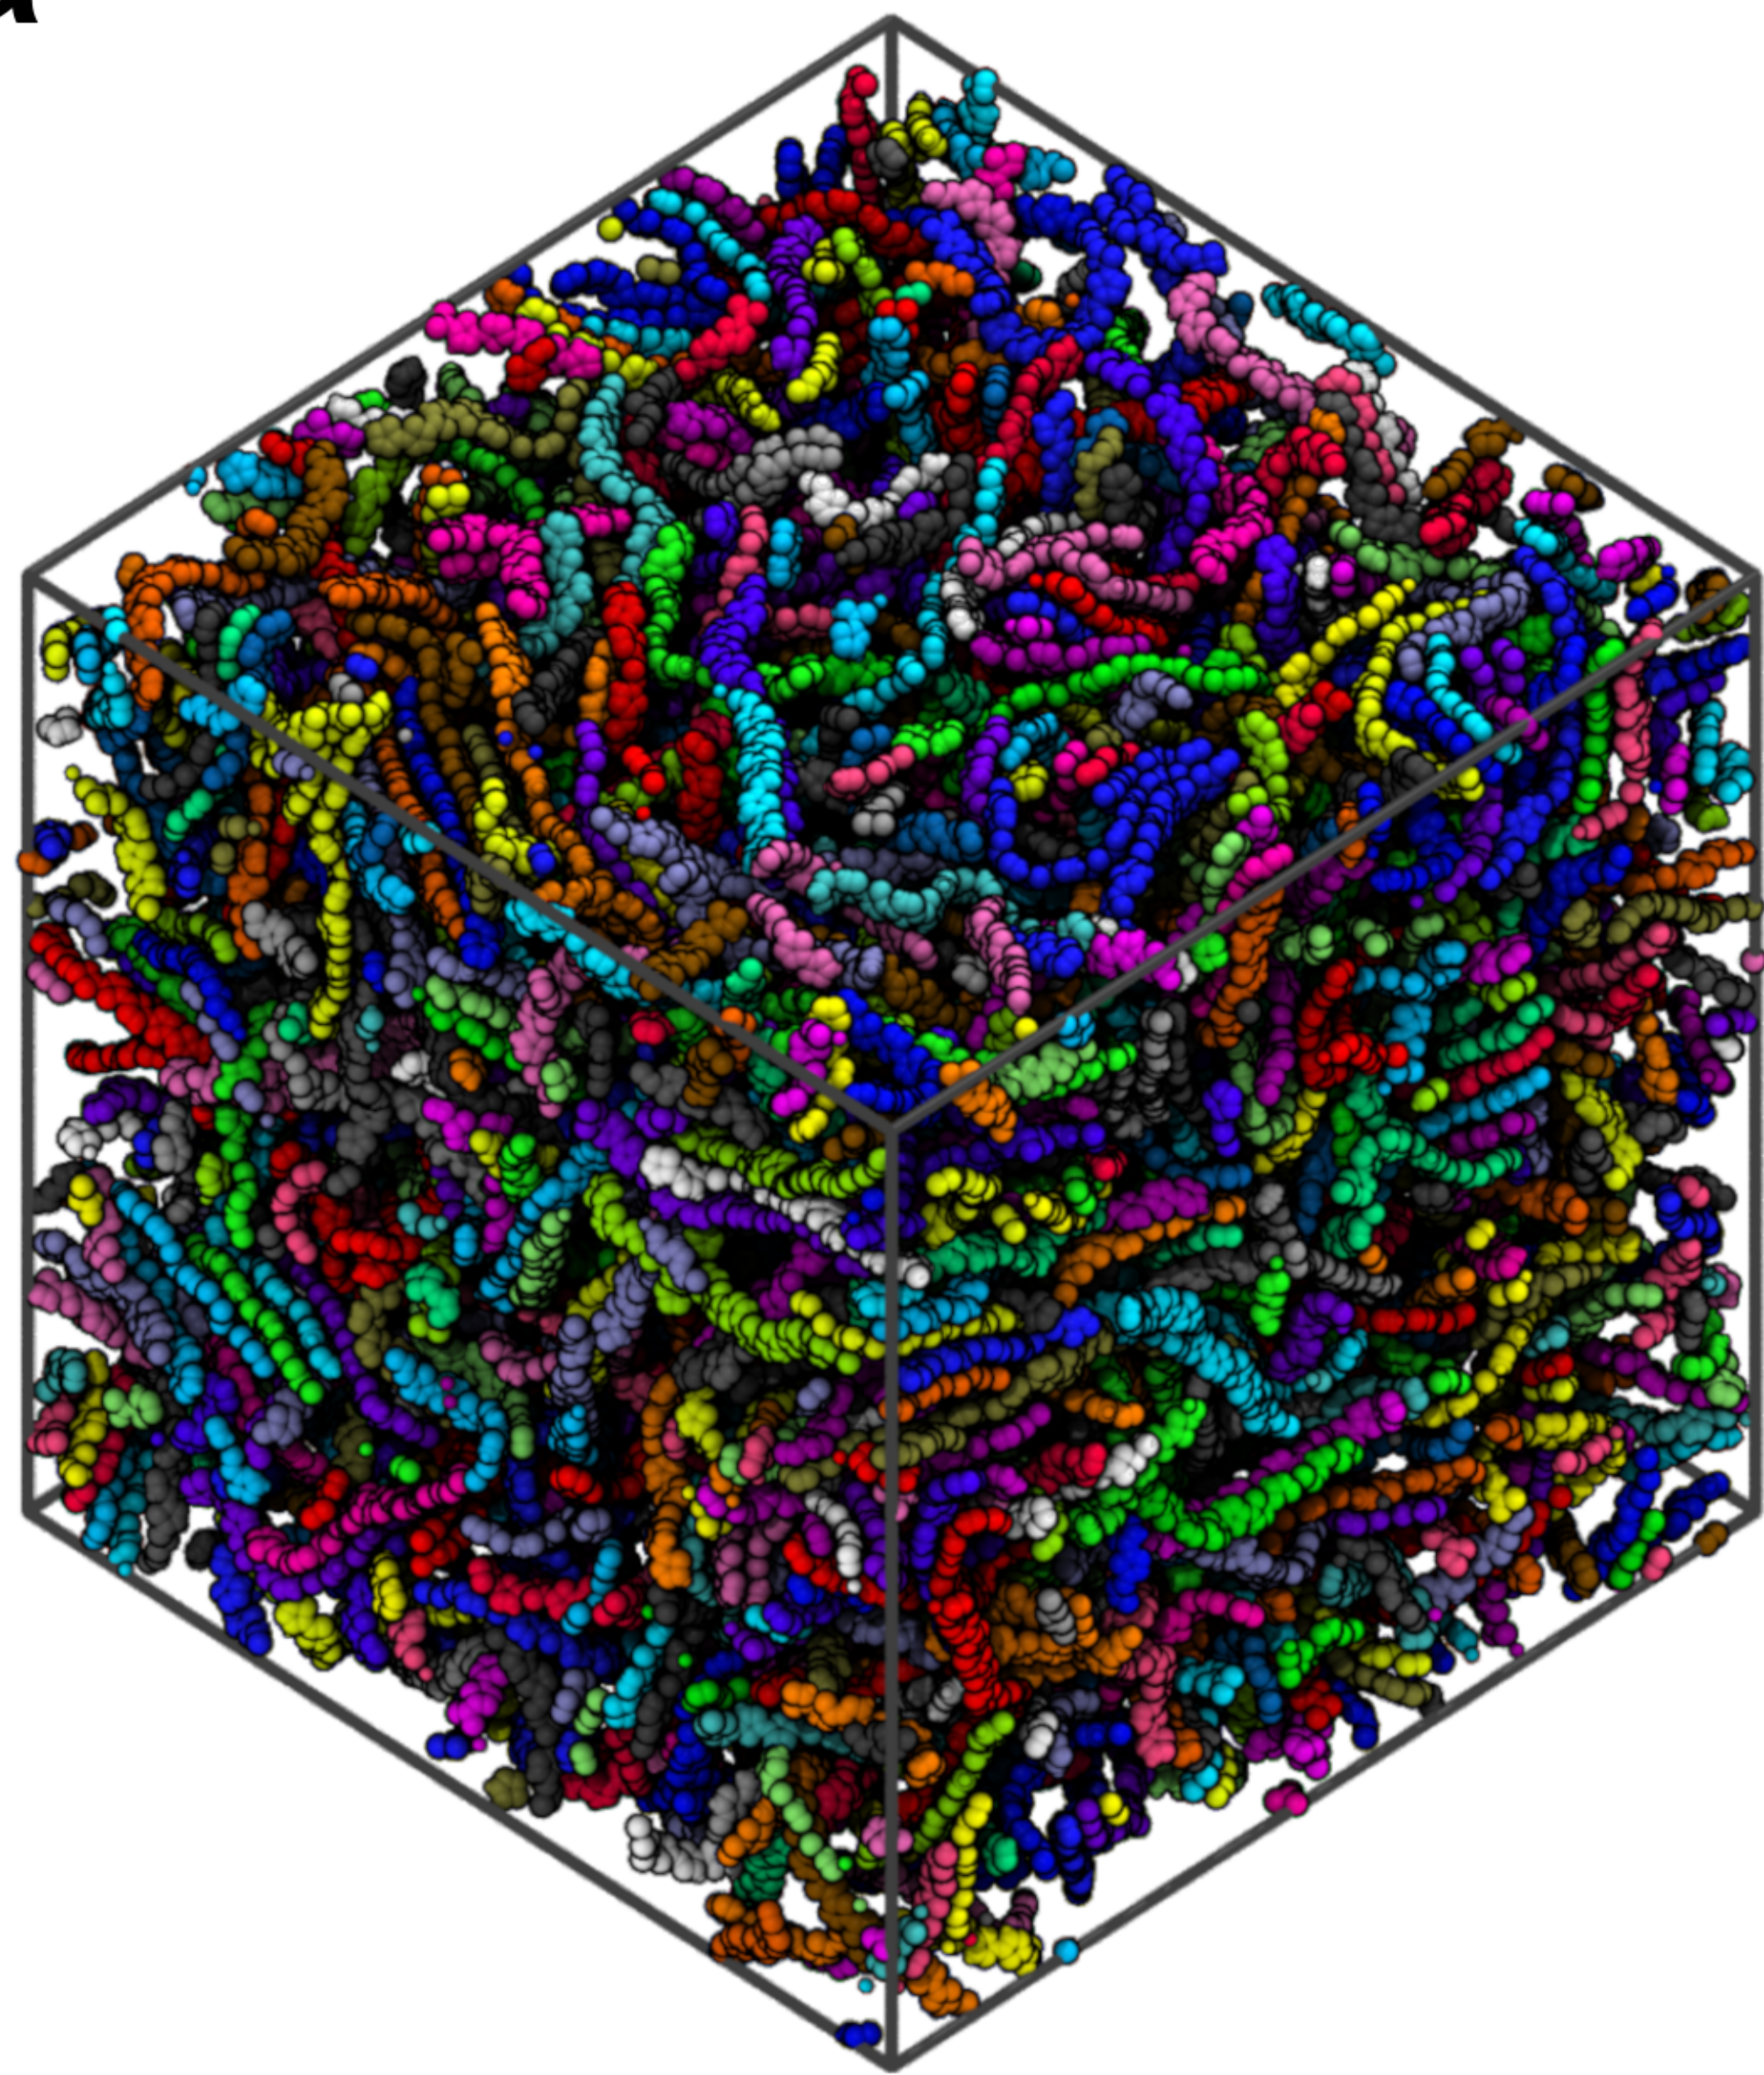

b

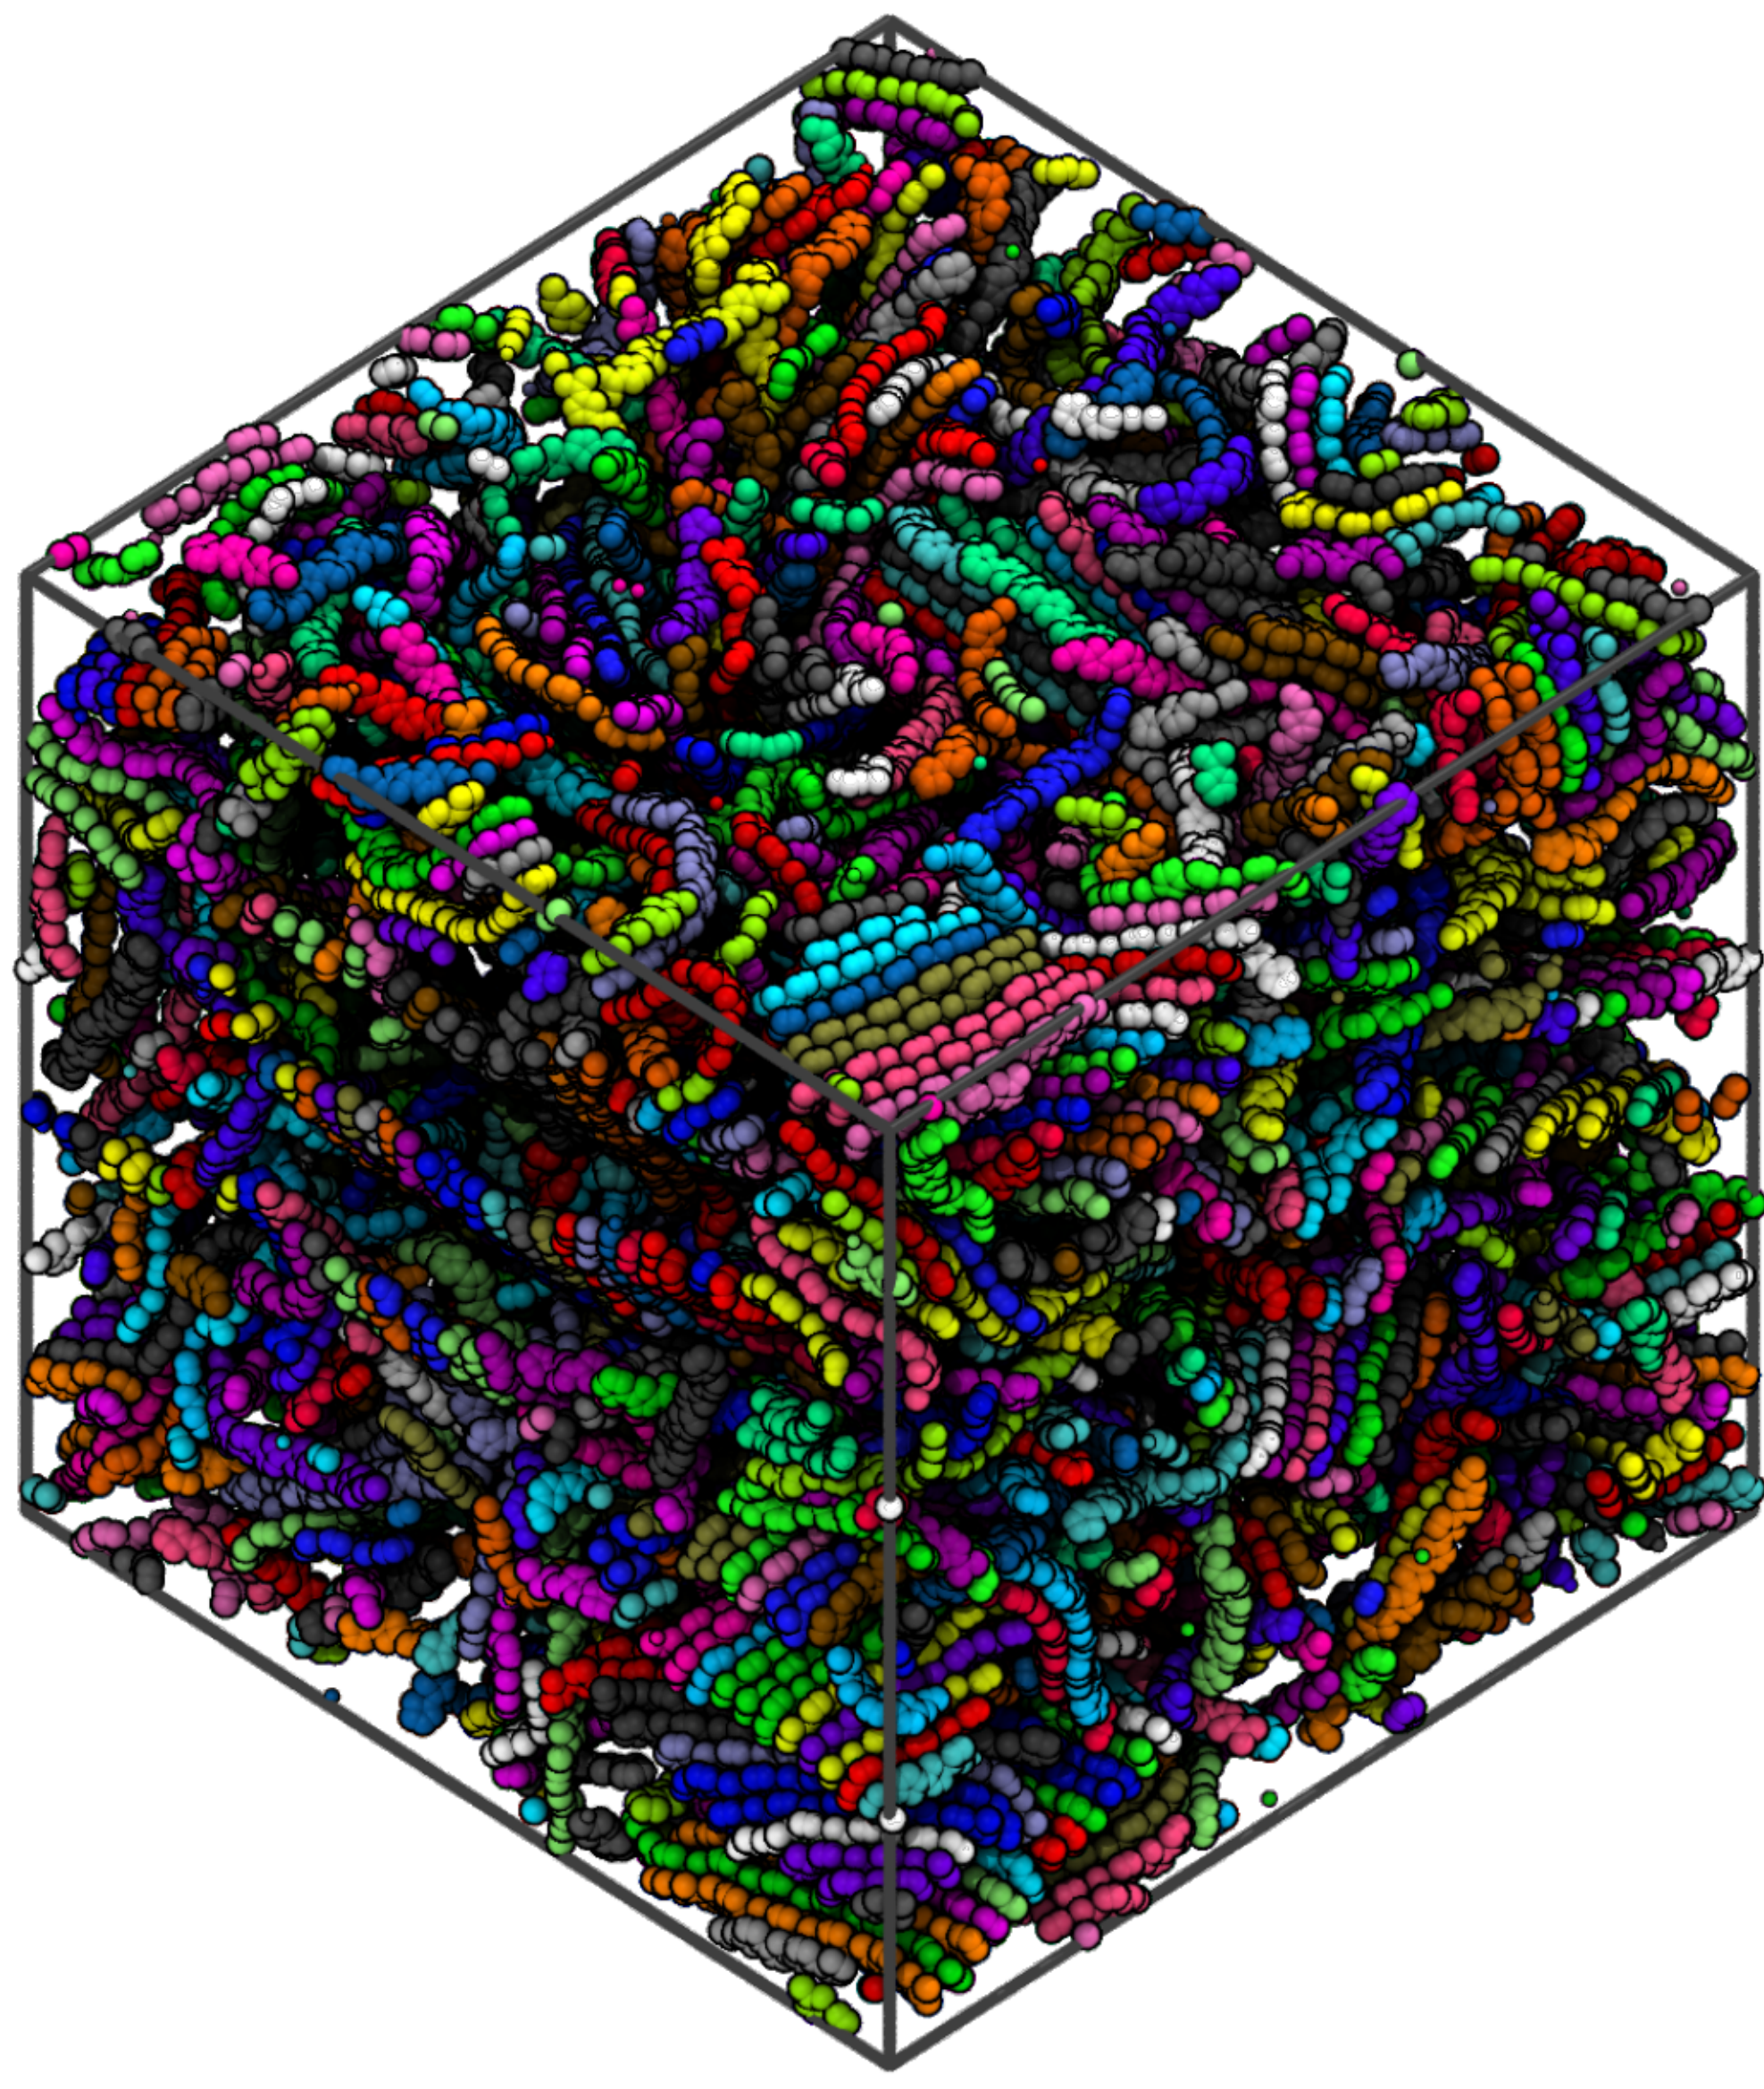

c

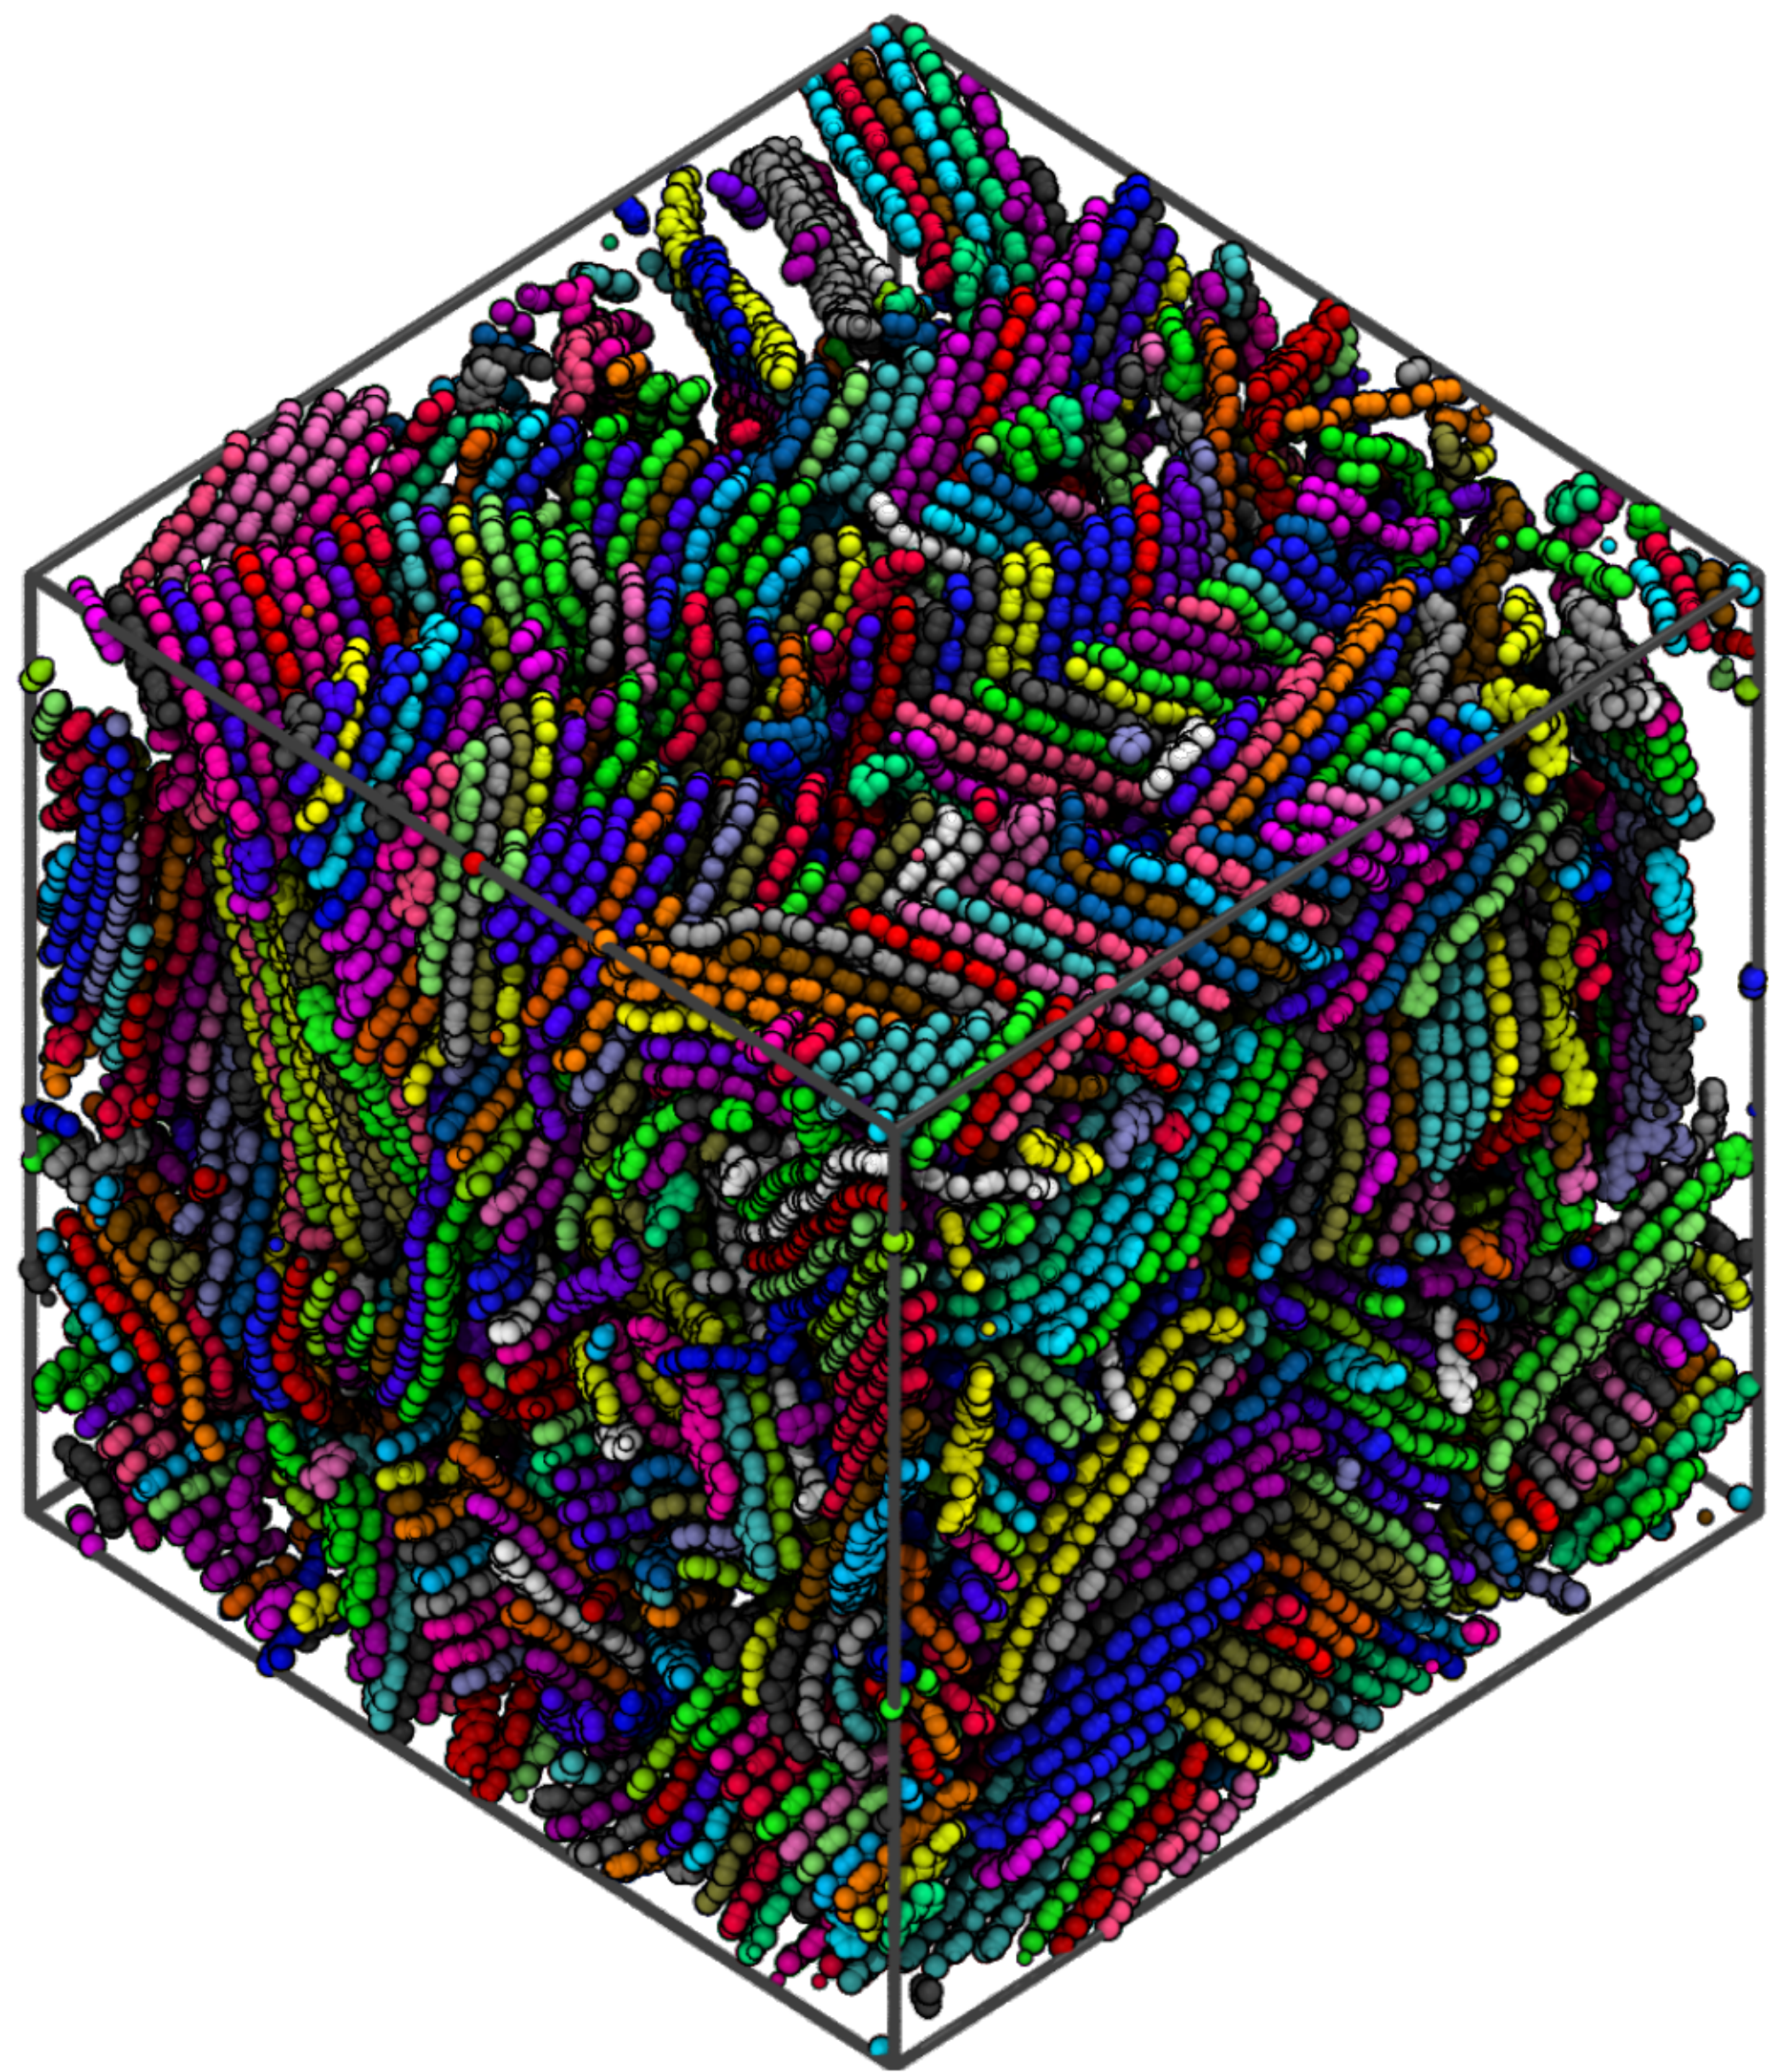

Supplement: Supplementary file 1 [file supplementary]

**a**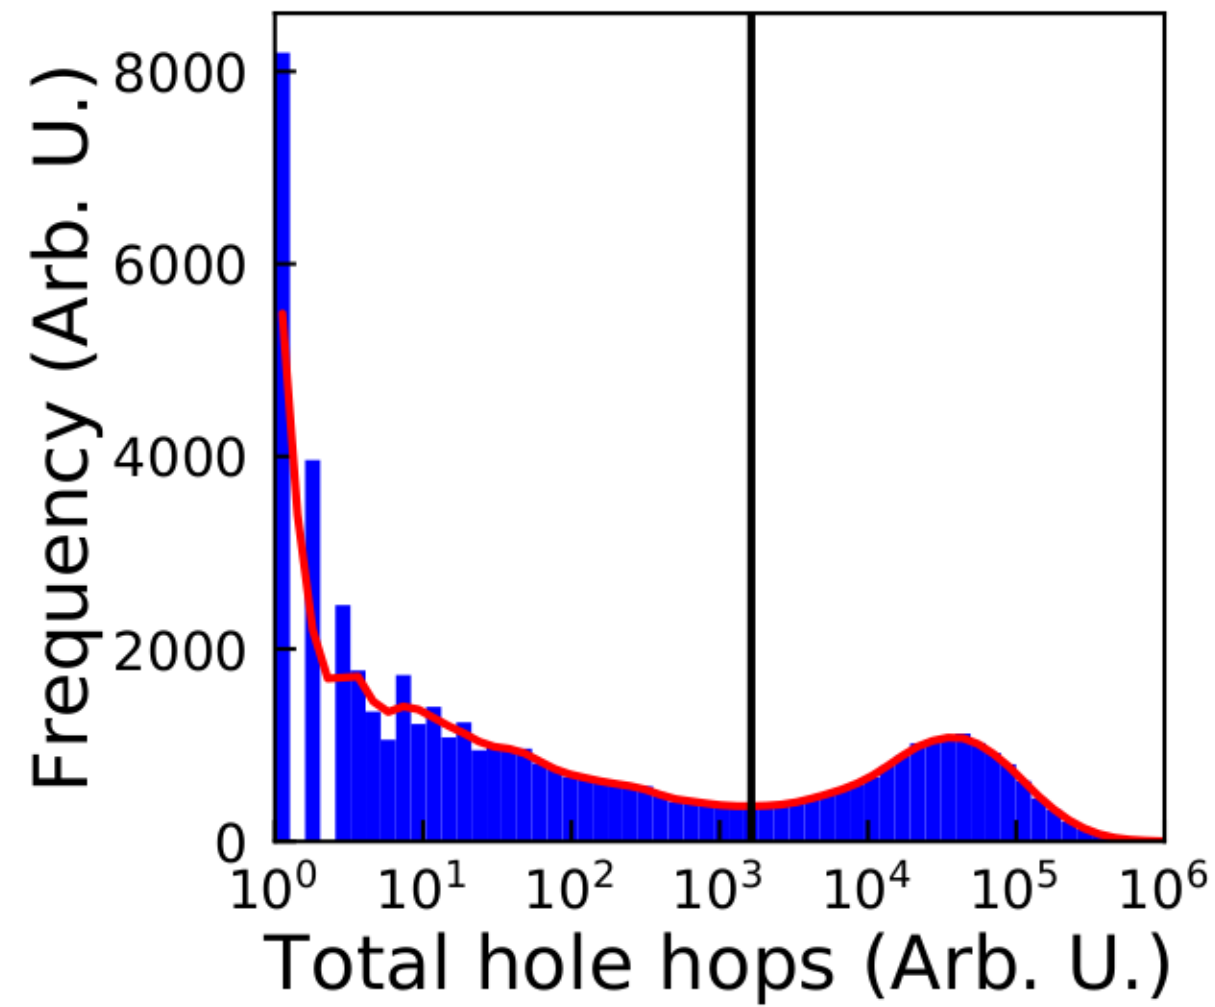**b**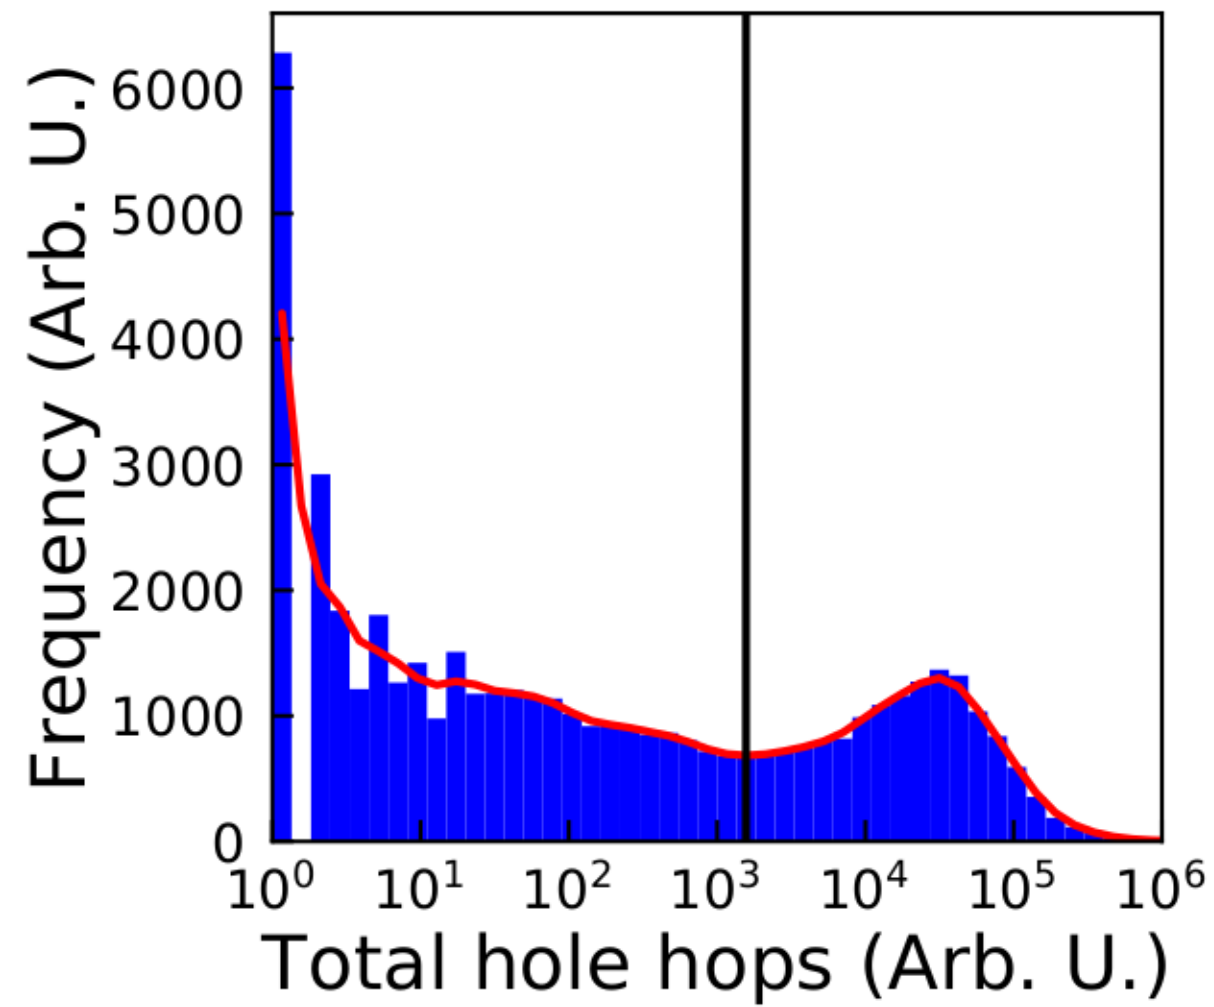**c**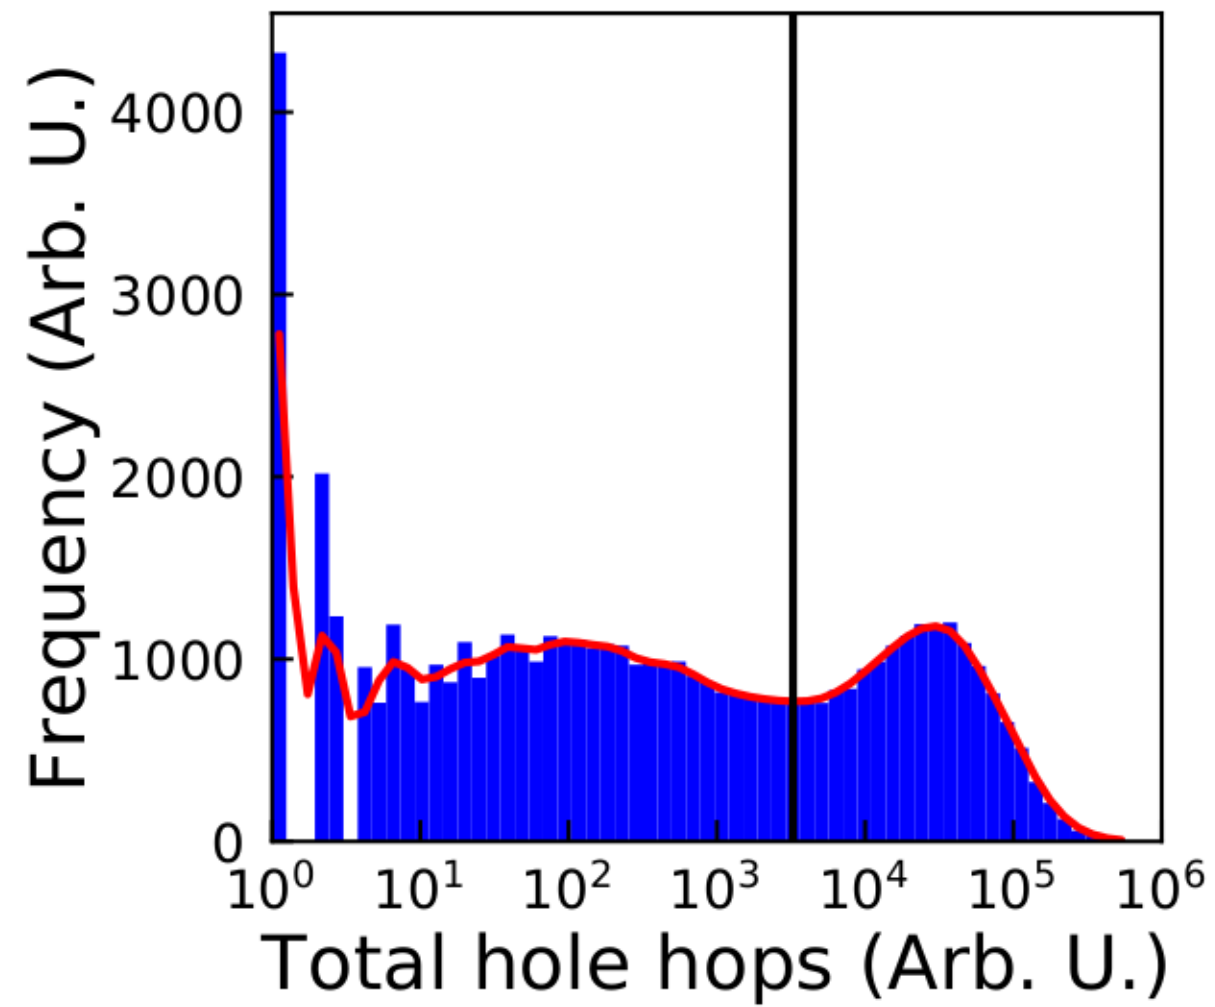

Supplement: Supplementary file 2 [file supplementary]

a

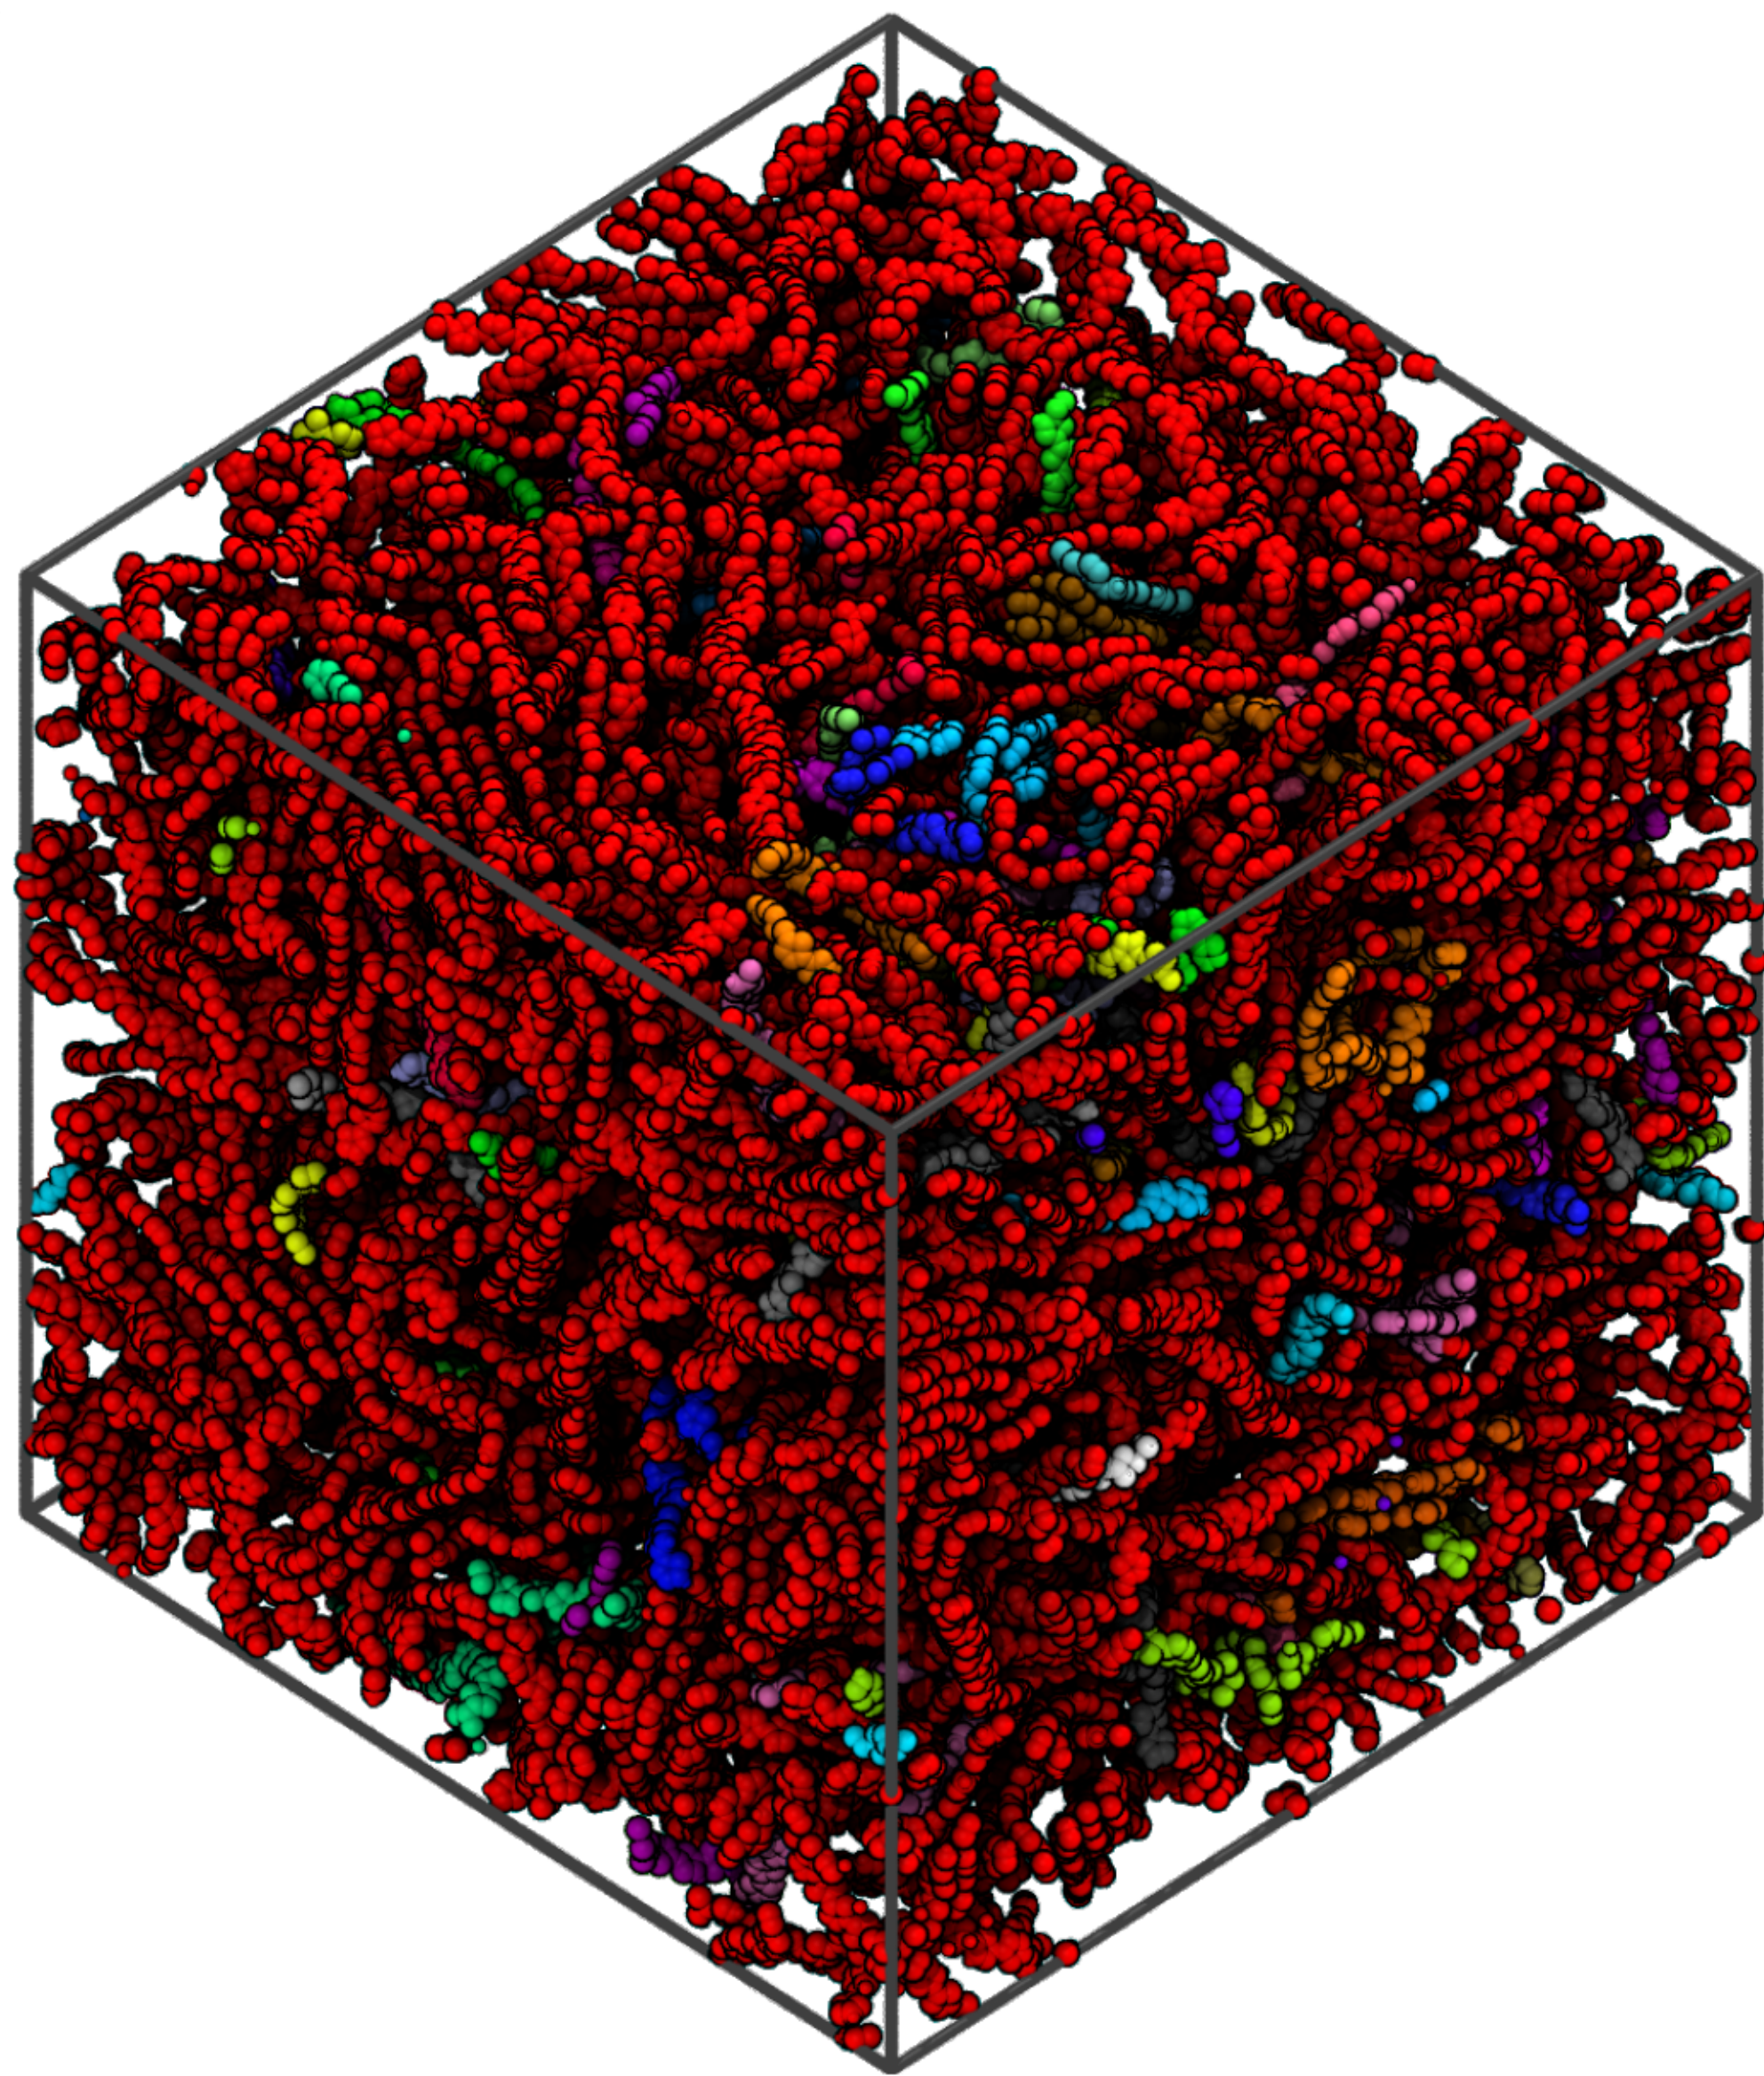

b

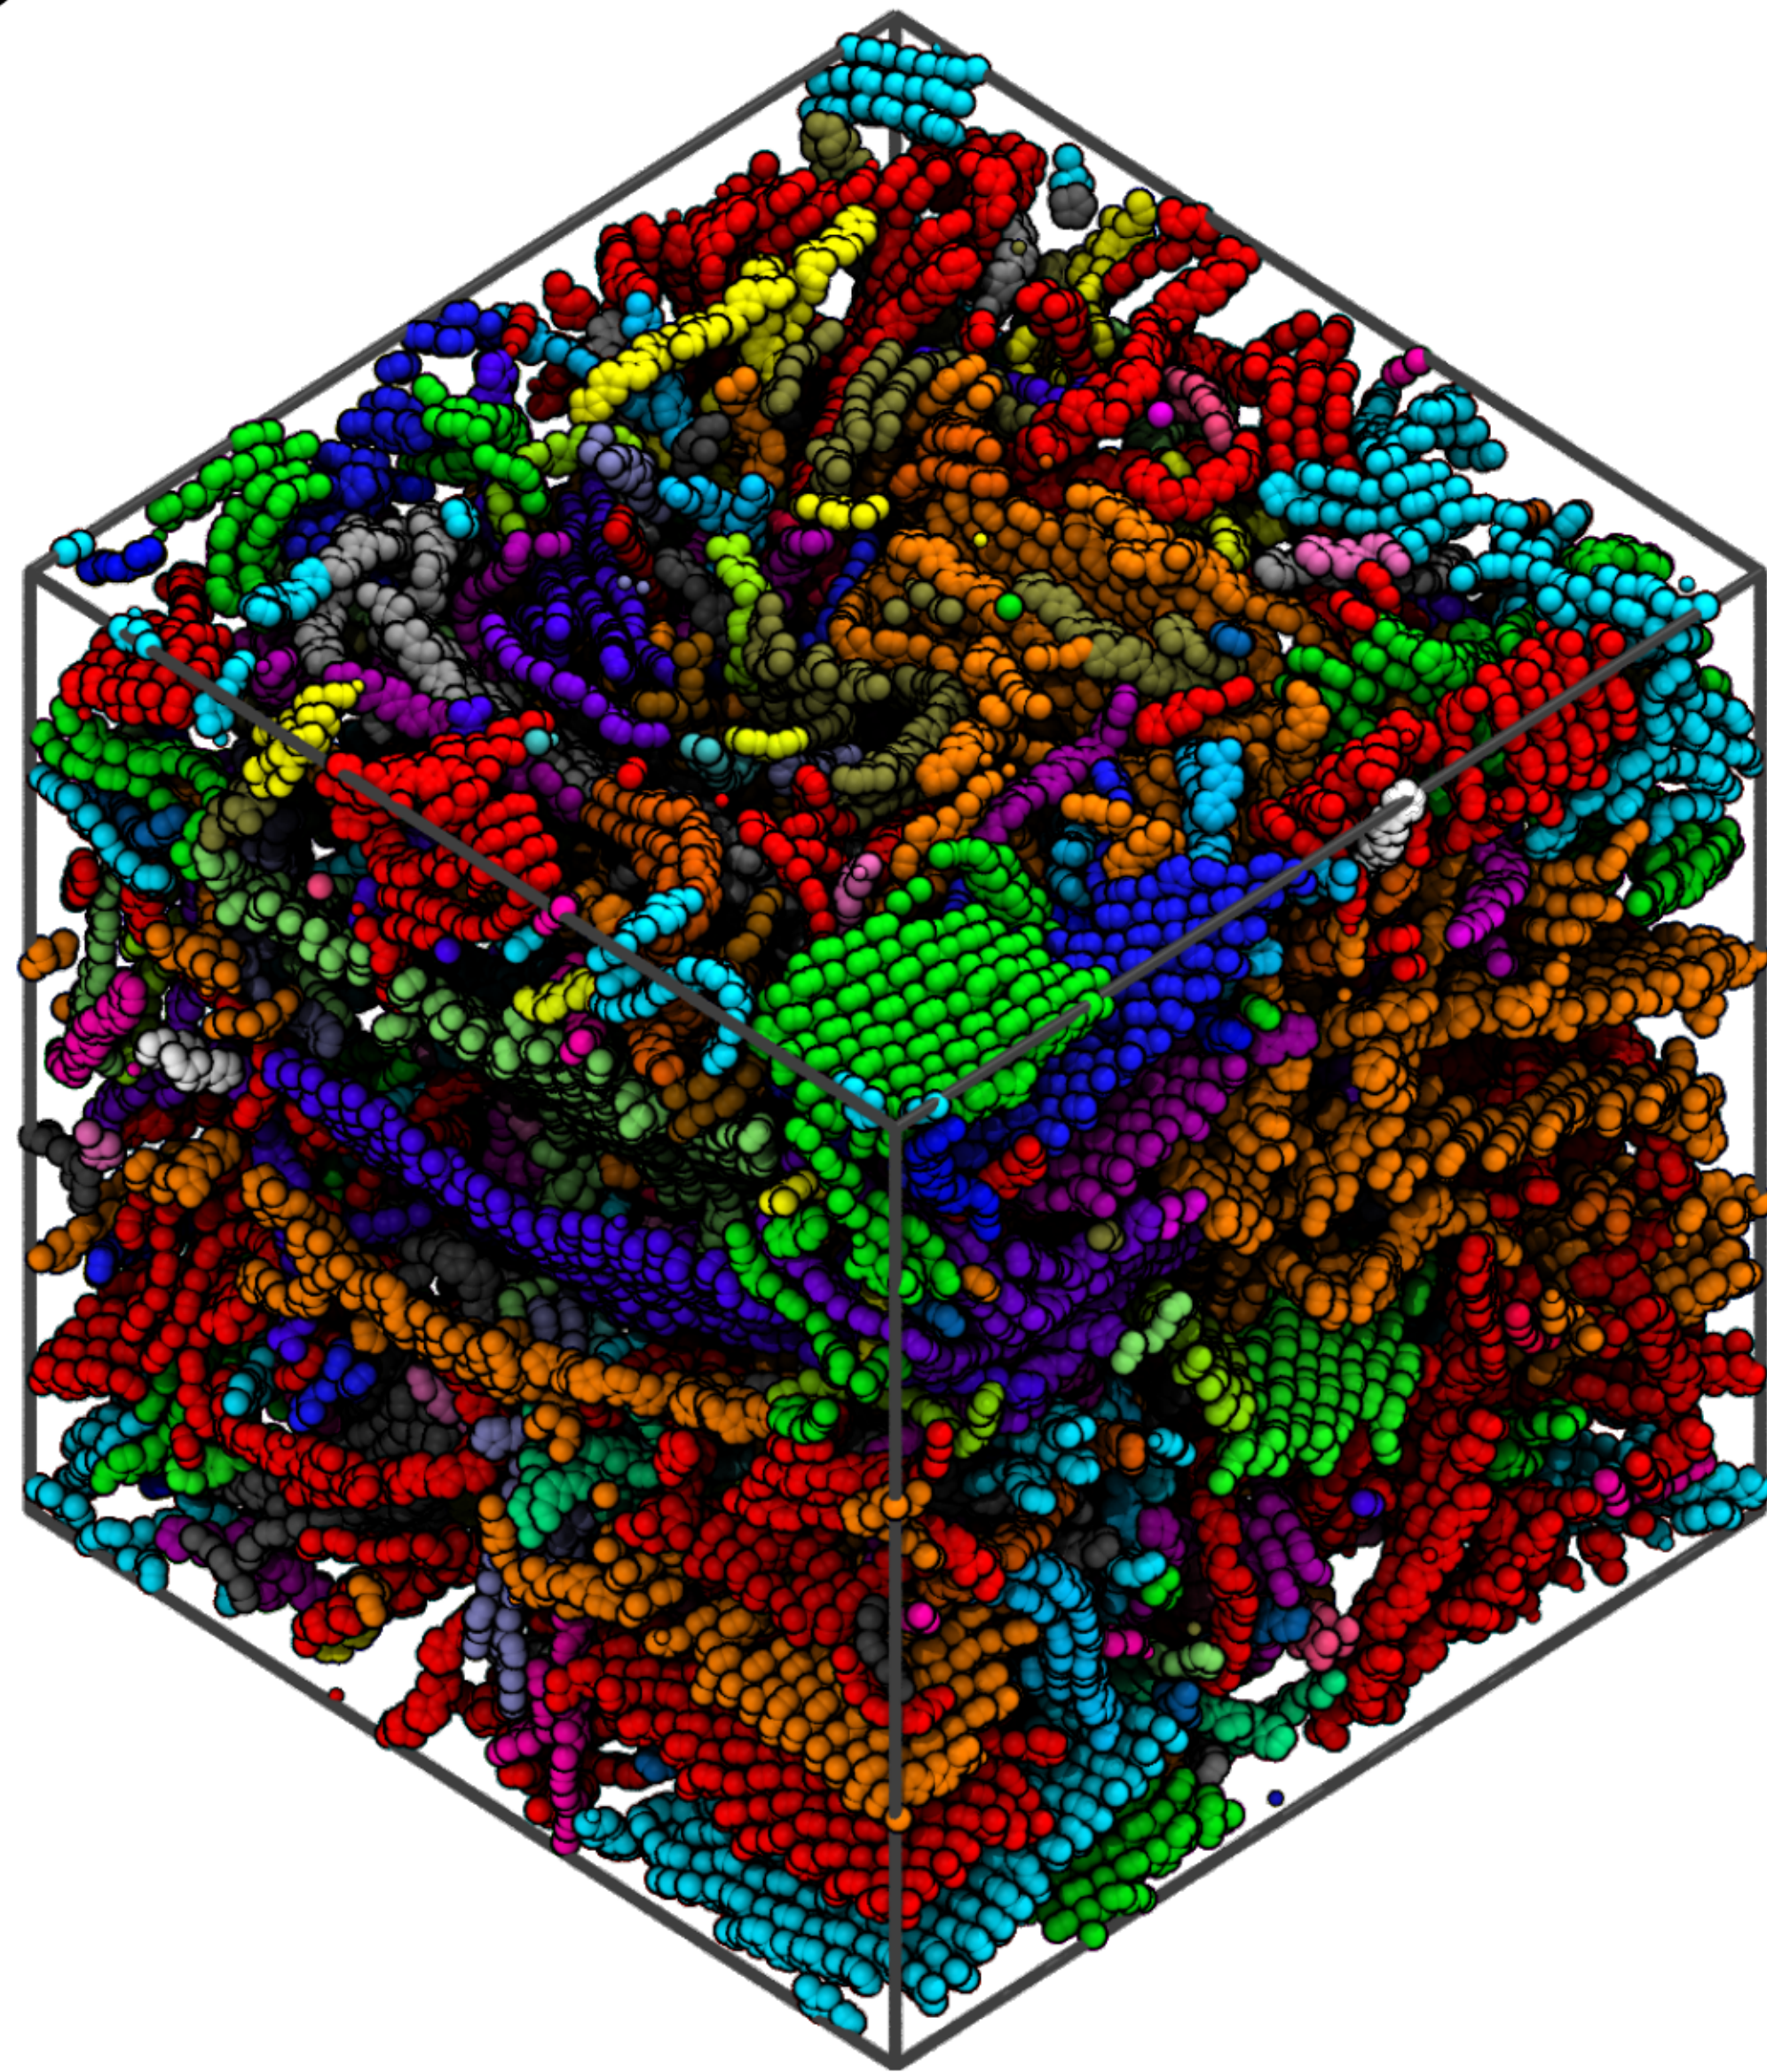

c

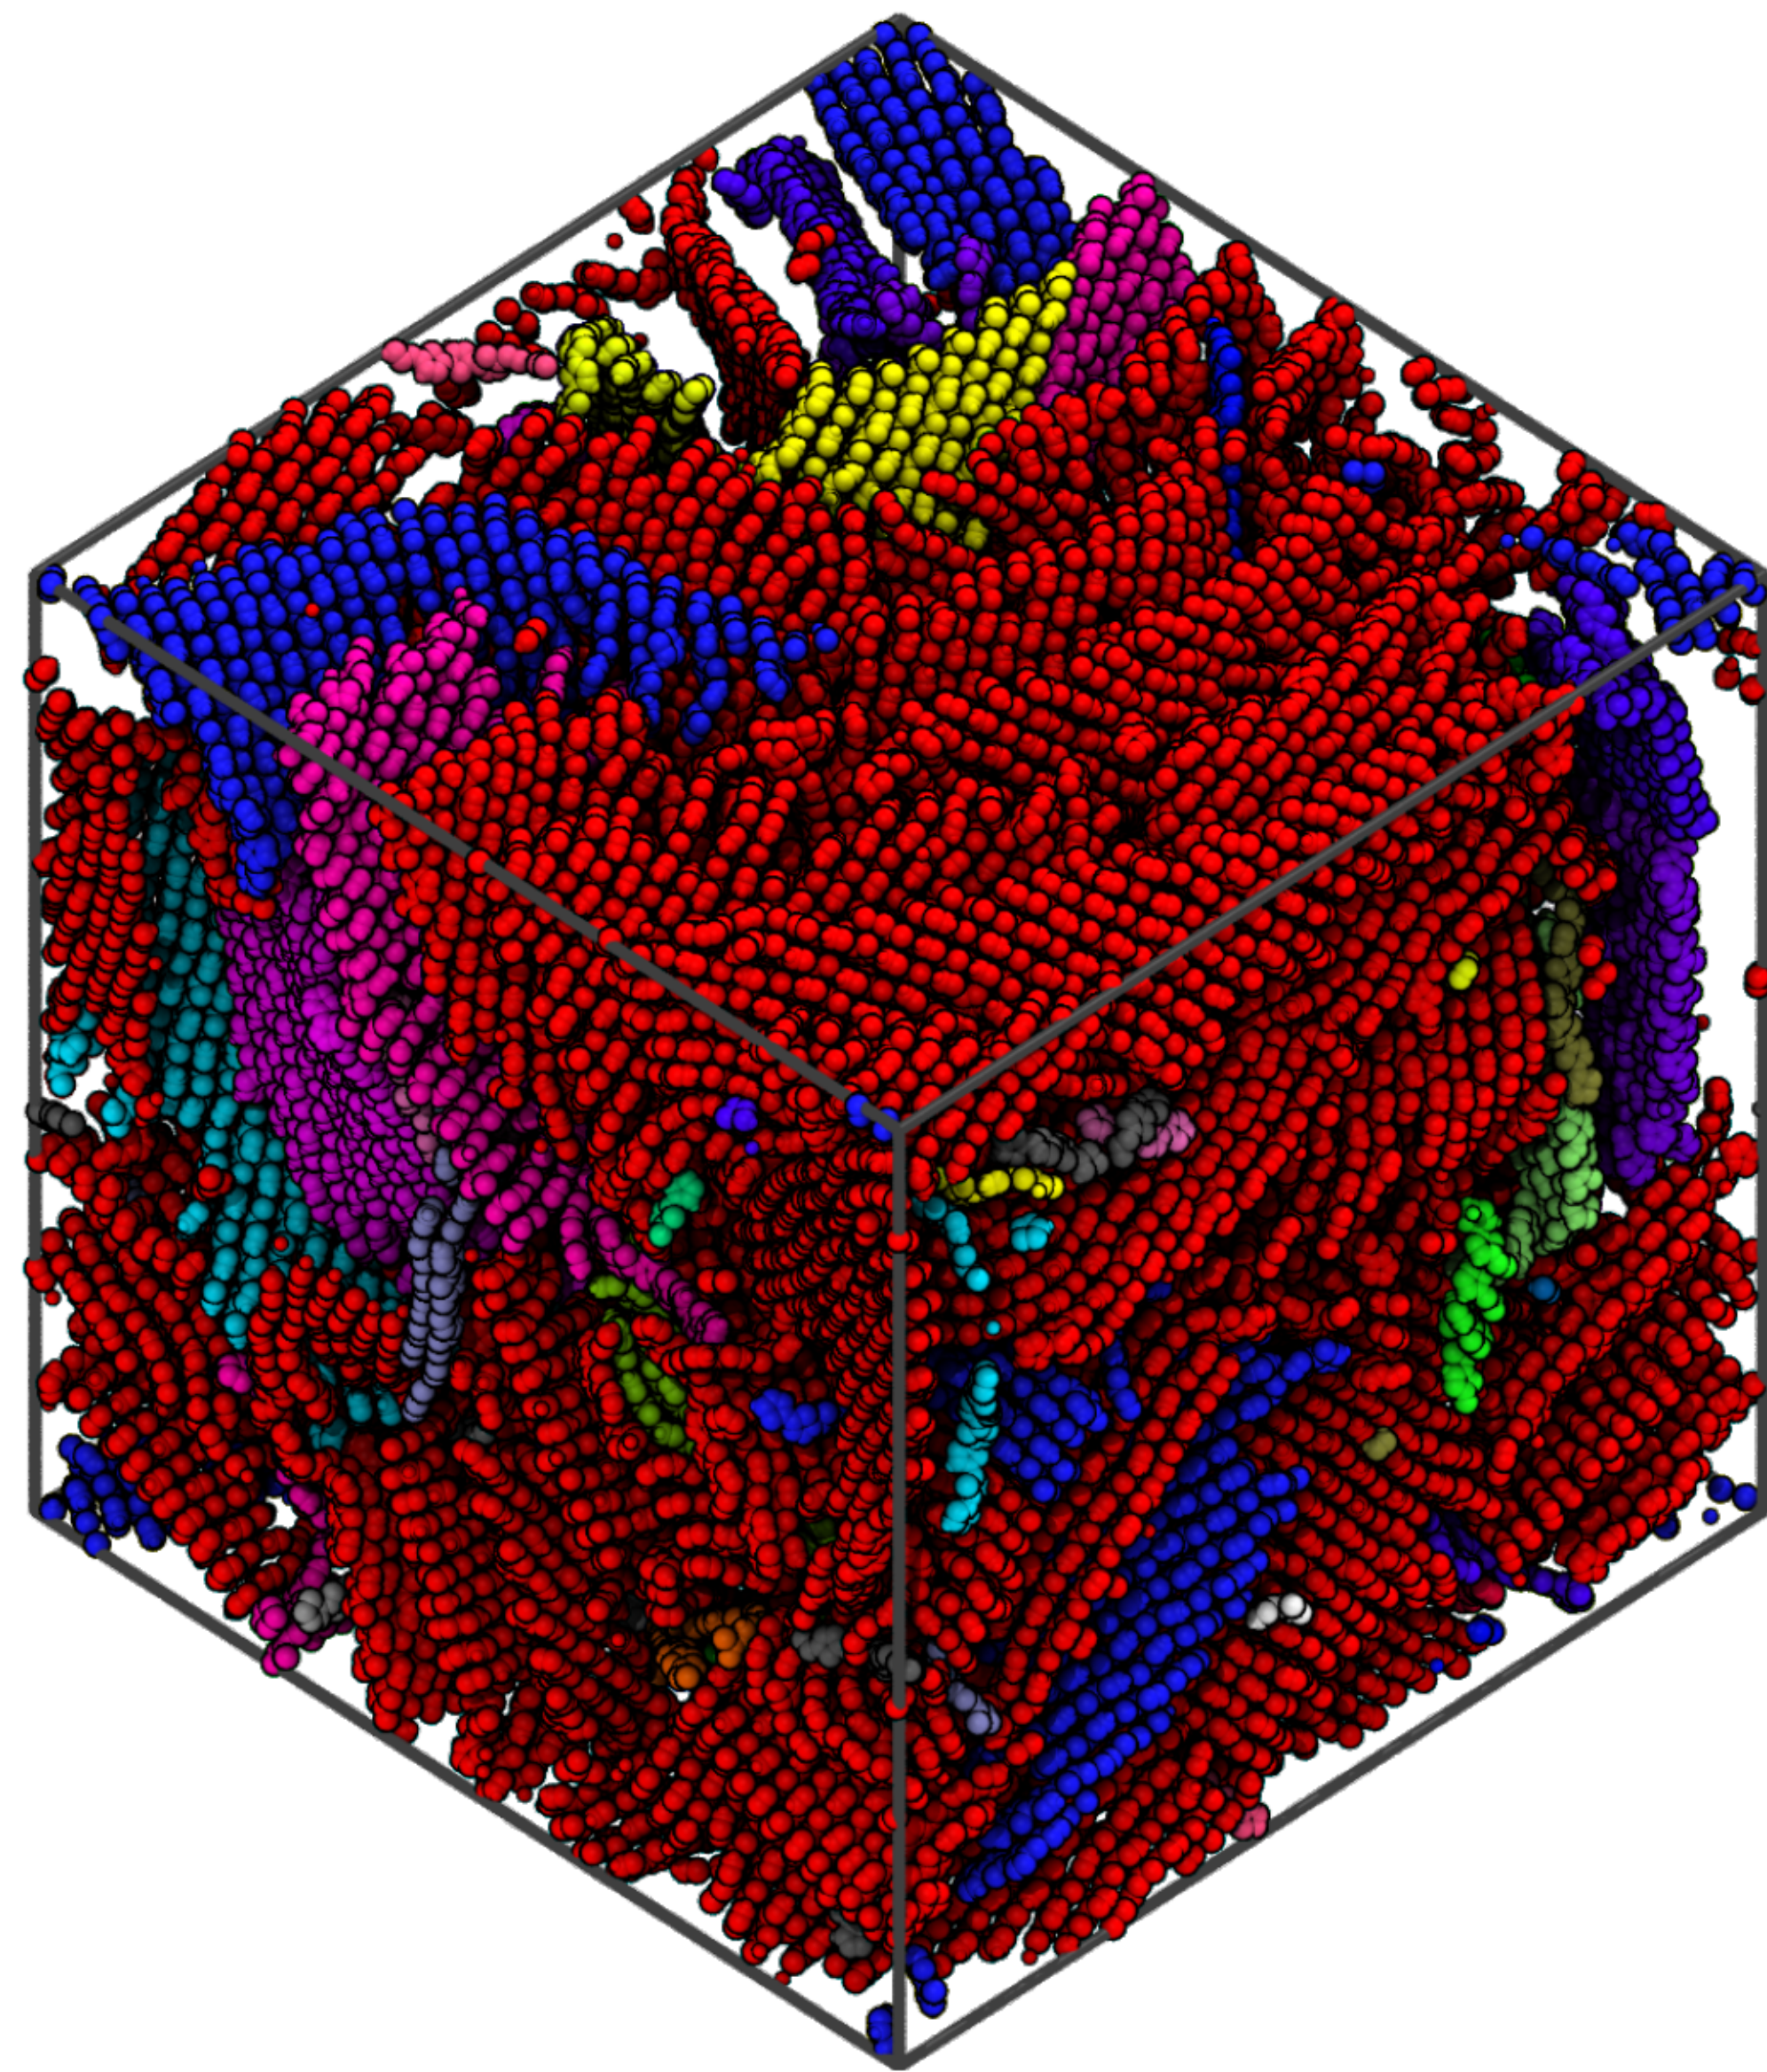

Supplement: Supplementary file 4 [file supplementary]

a)

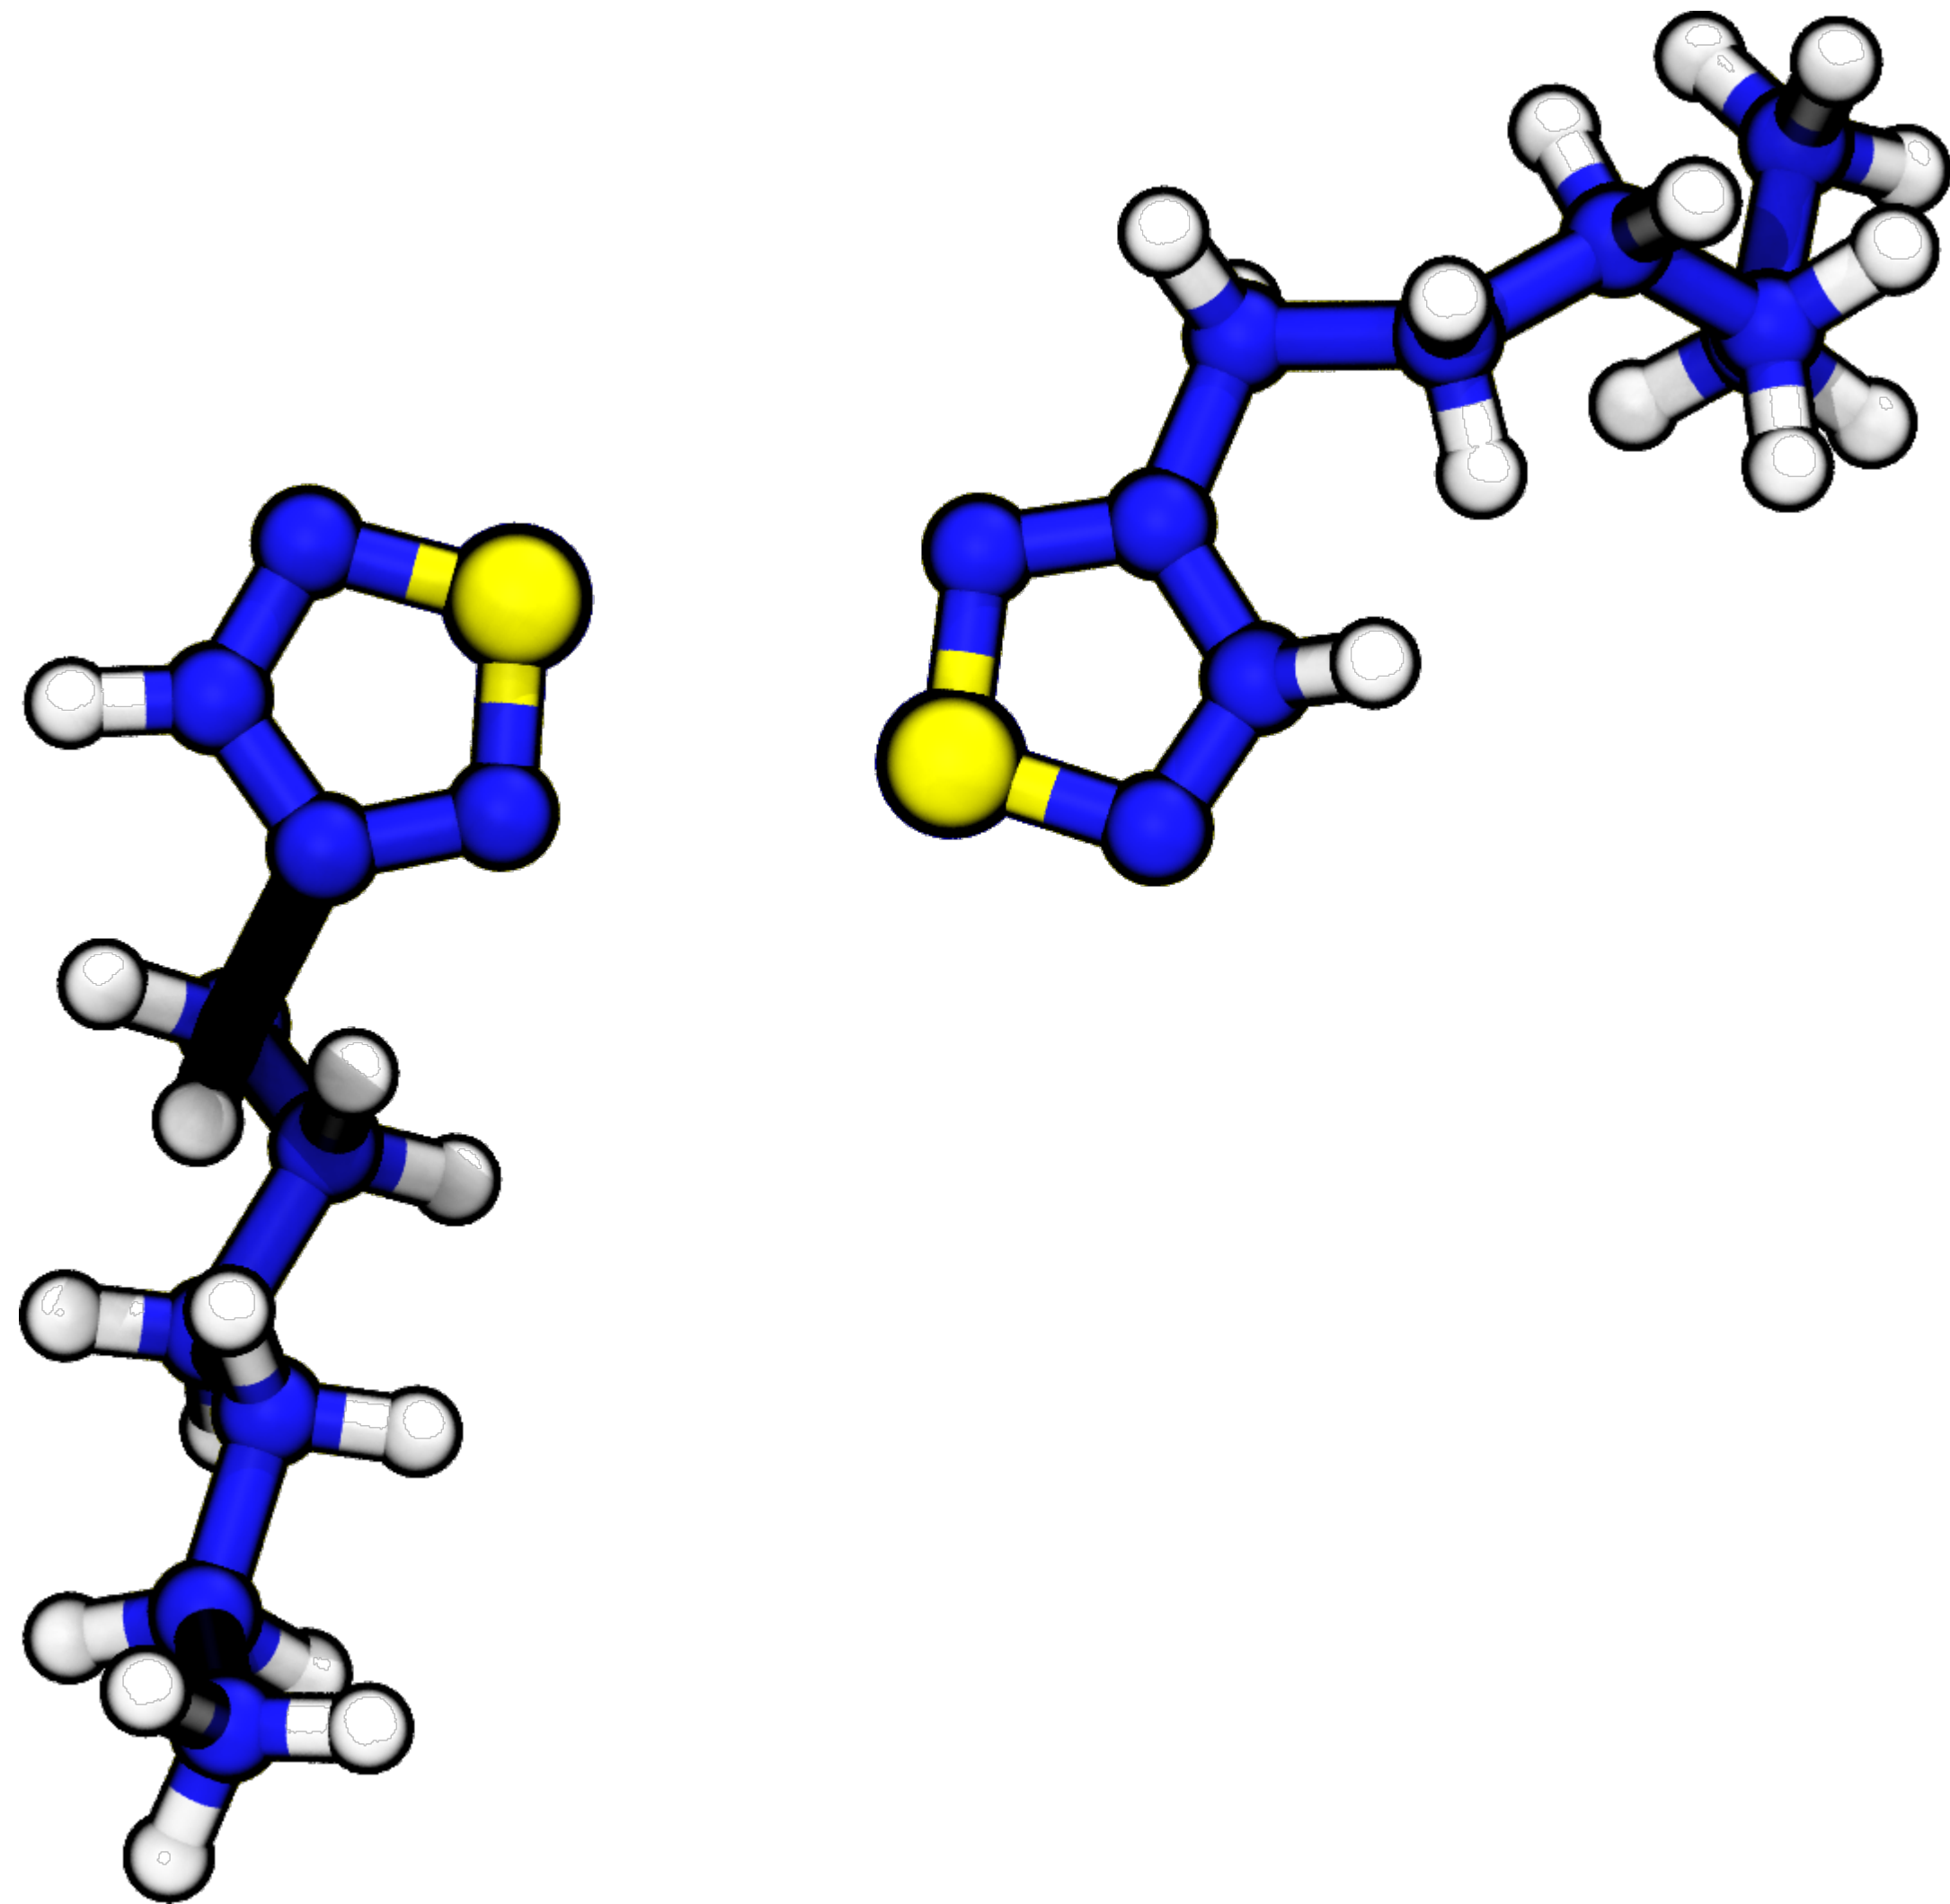

b)

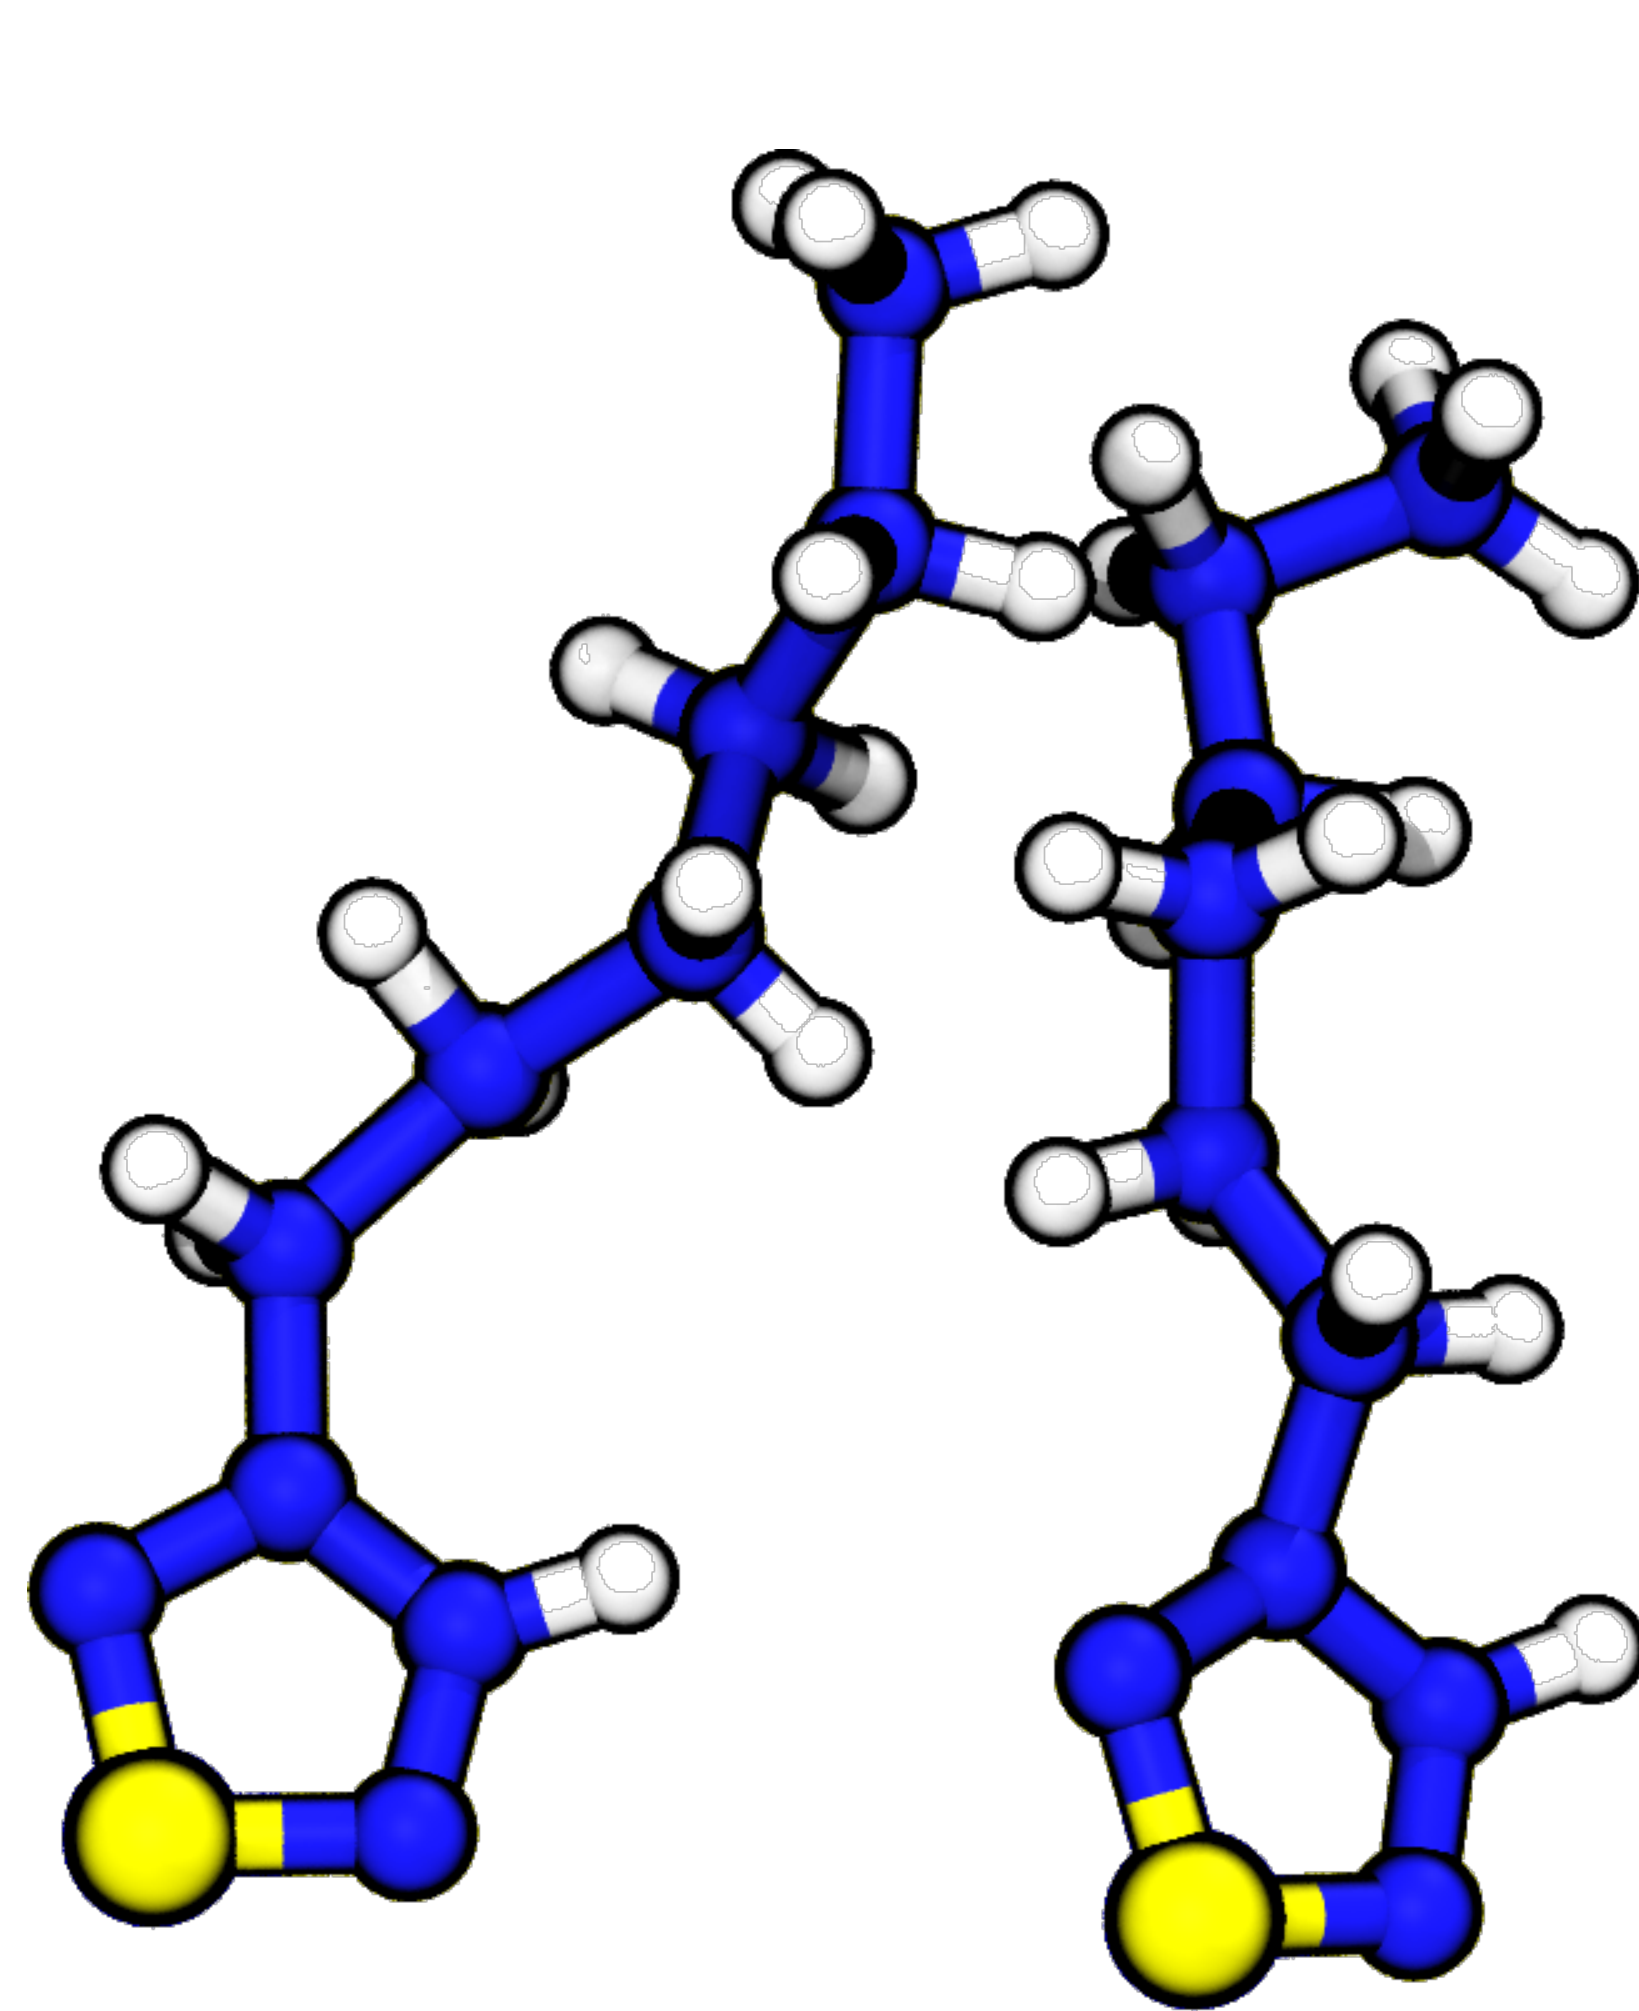

c)

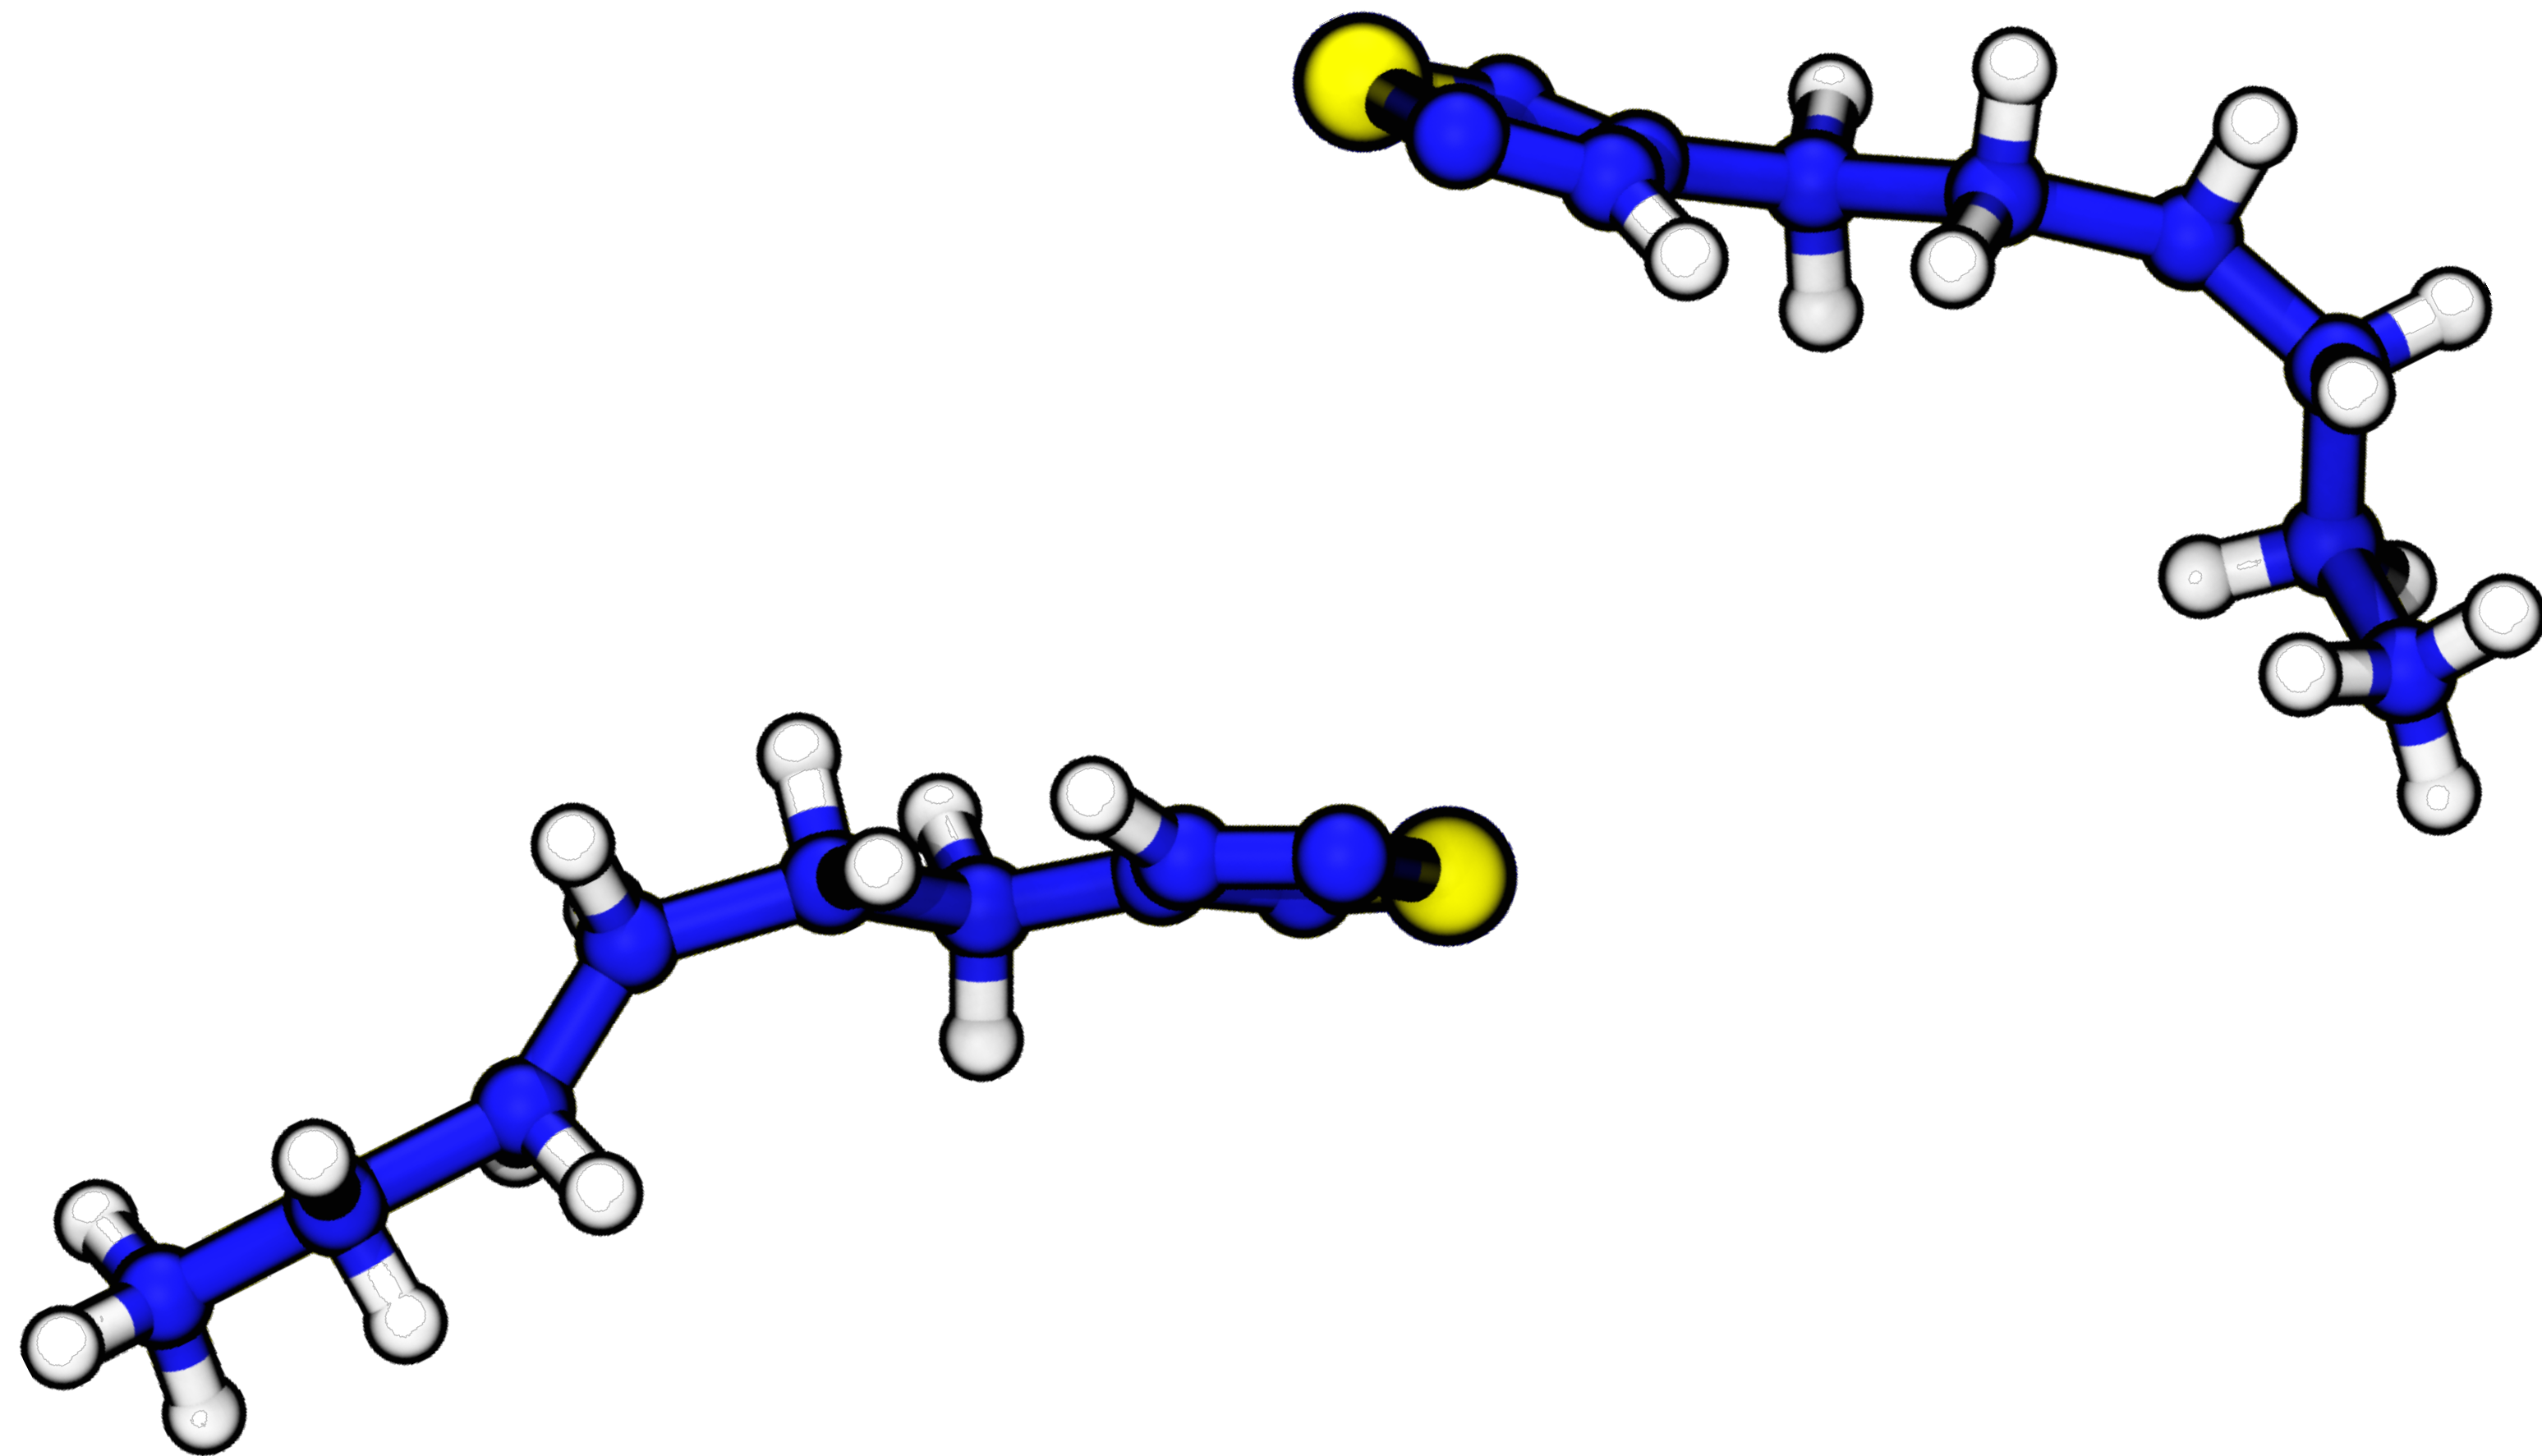

Supplement: Supplementary file 5 [file supplementary]

**a**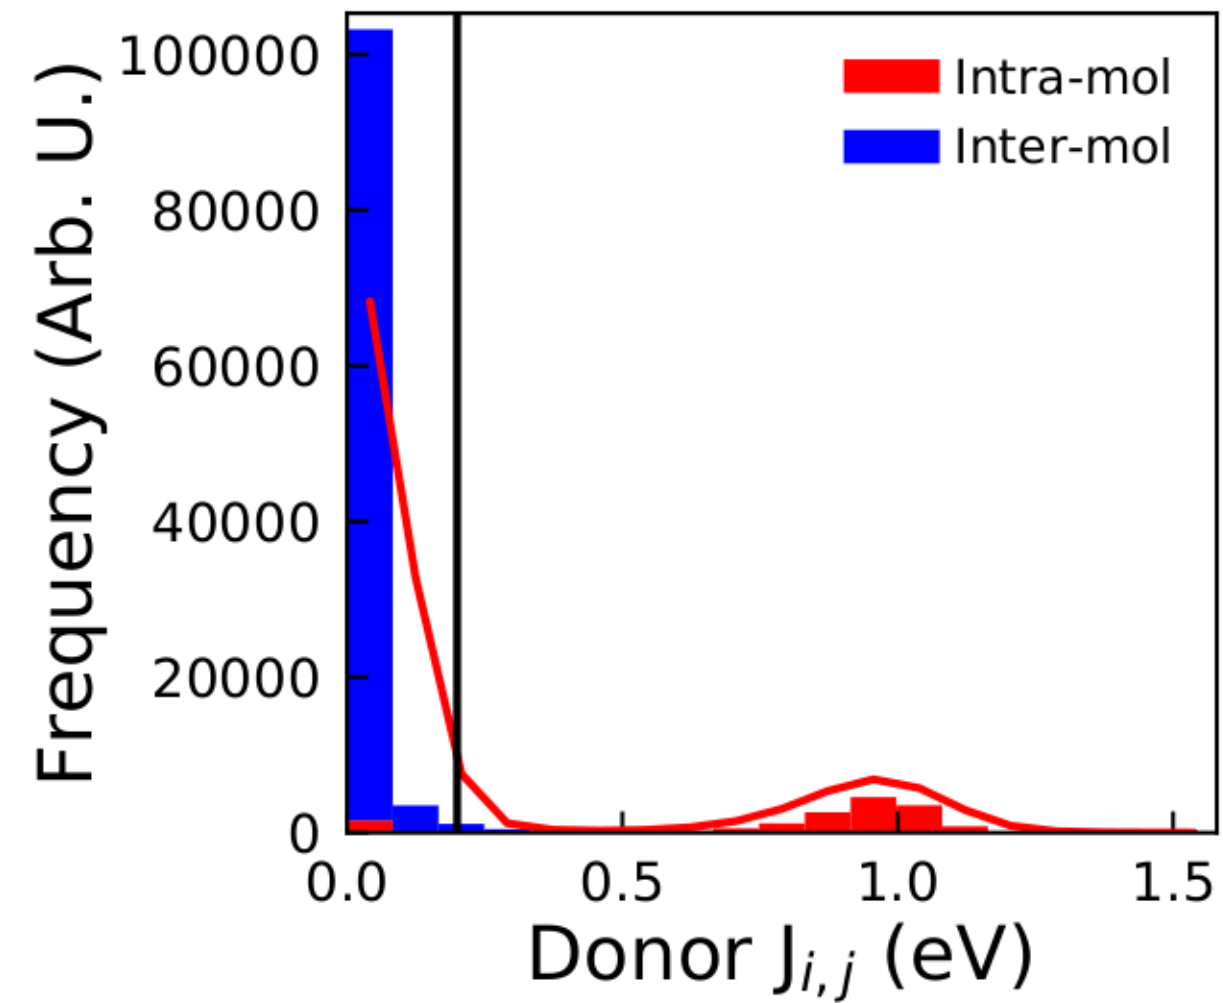**b**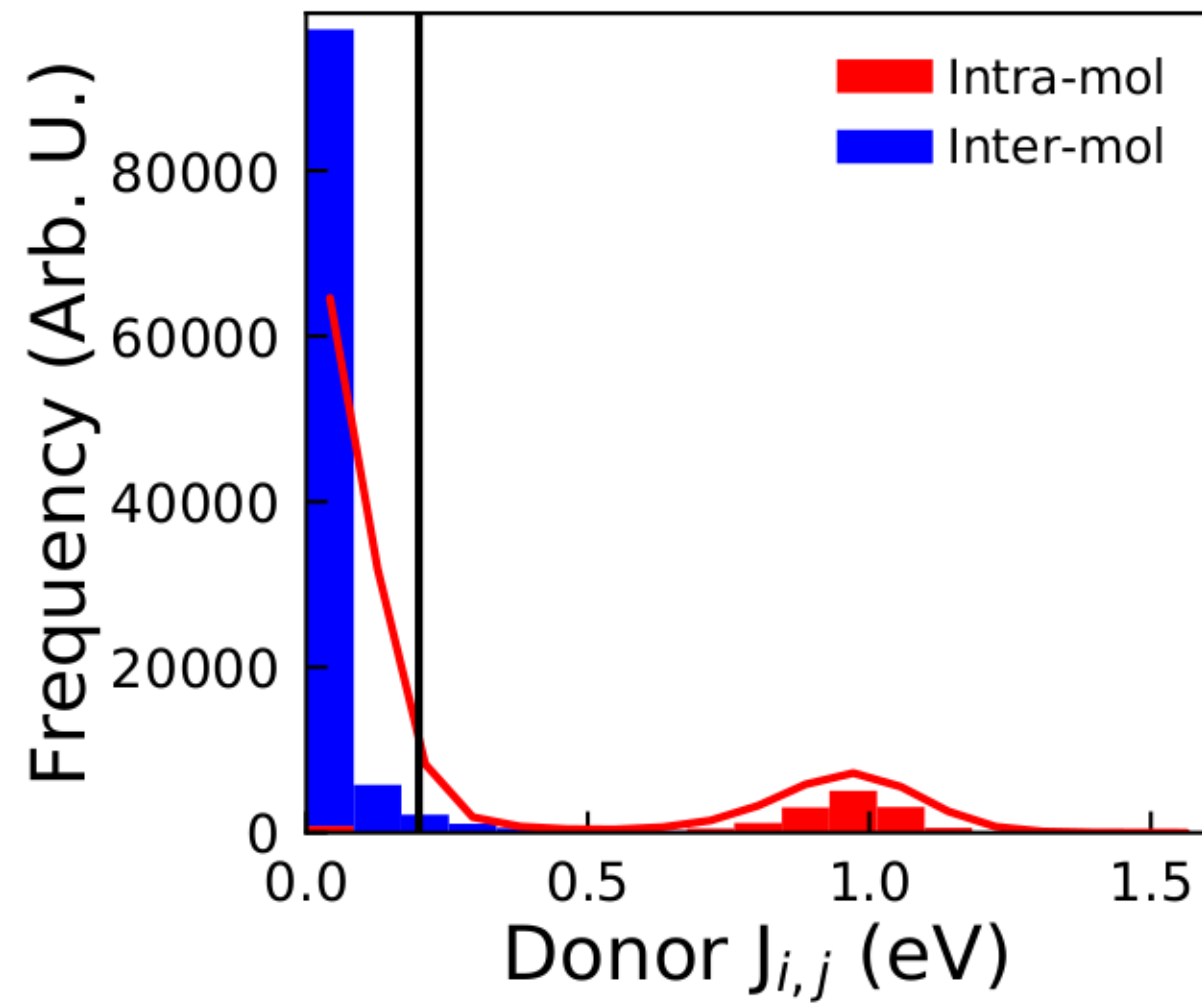**c**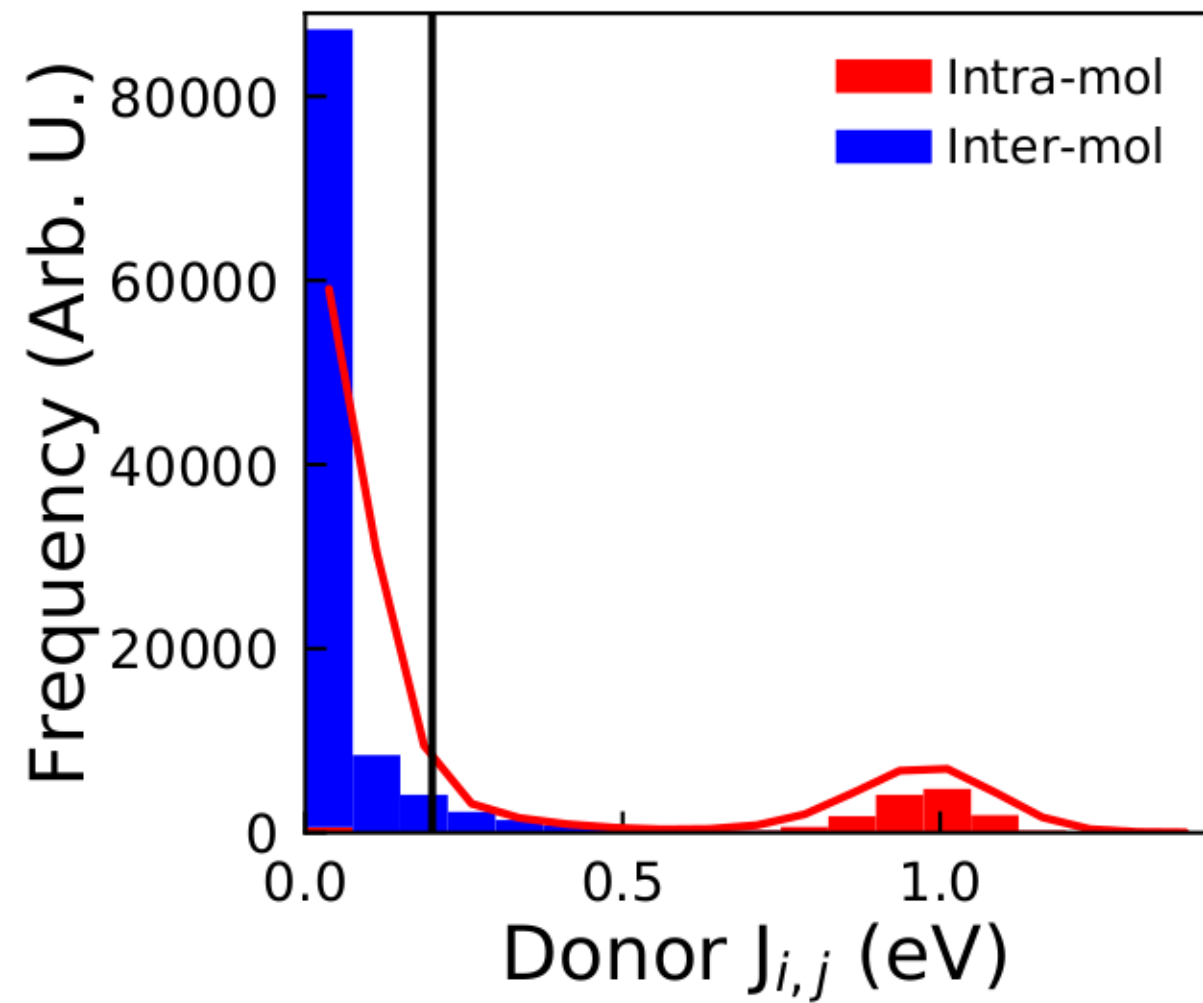

Supplement: Supplementary file 6 [file supplementary]

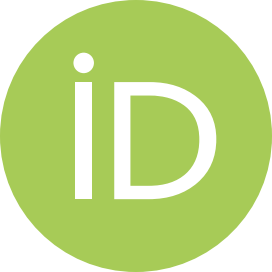

Supplement: Supplementary file 7 [file supplementary]

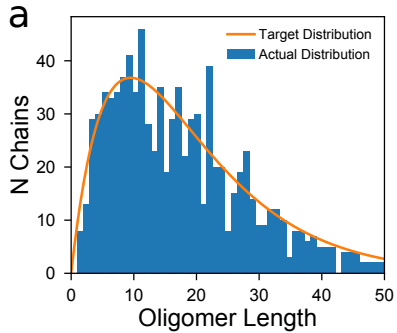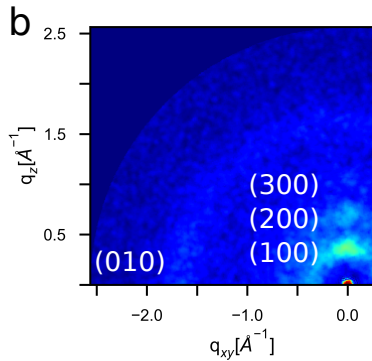

Supplement: Supplementary file 8 [file supplementary]

**a**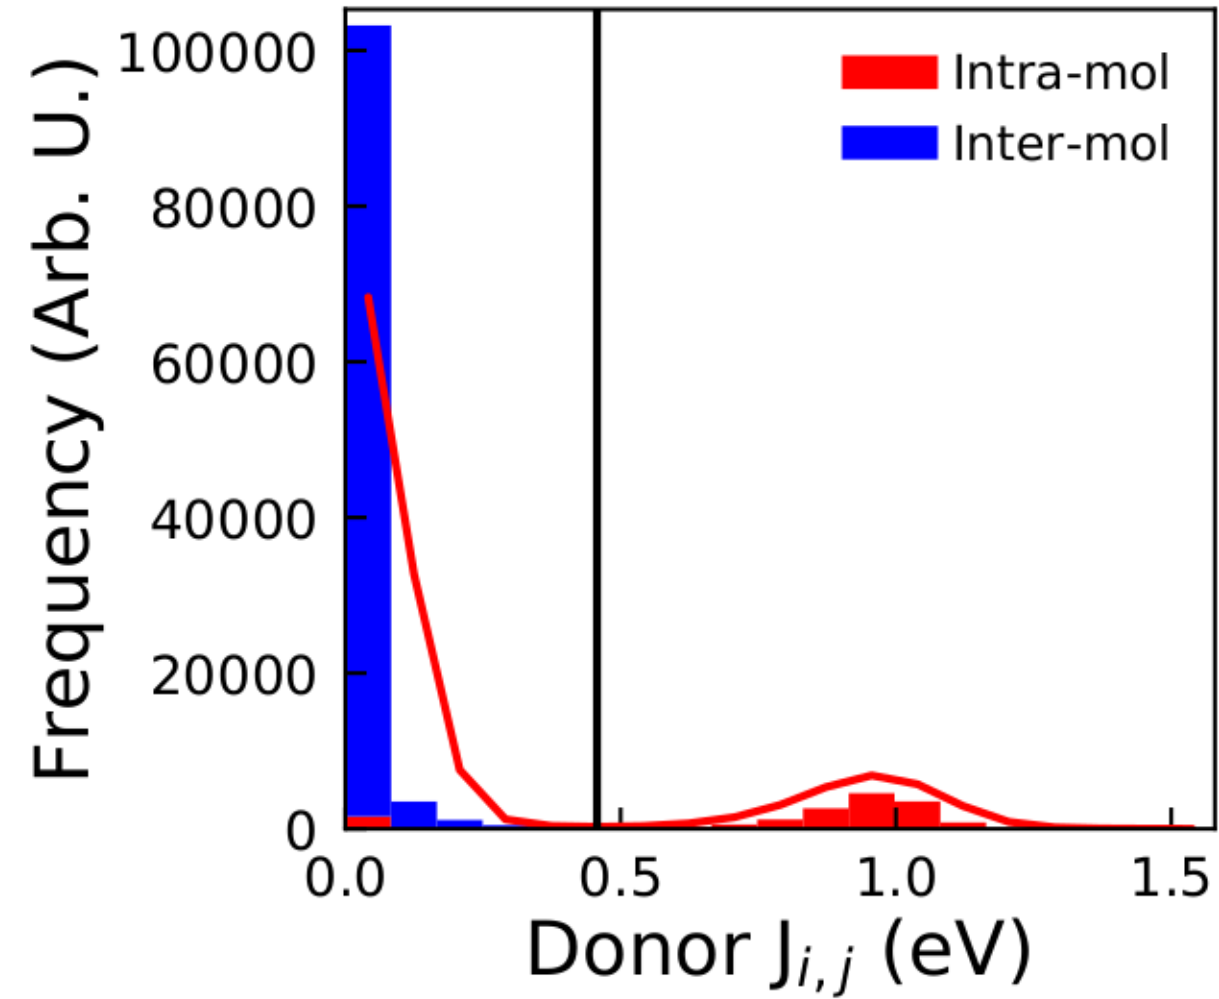**b**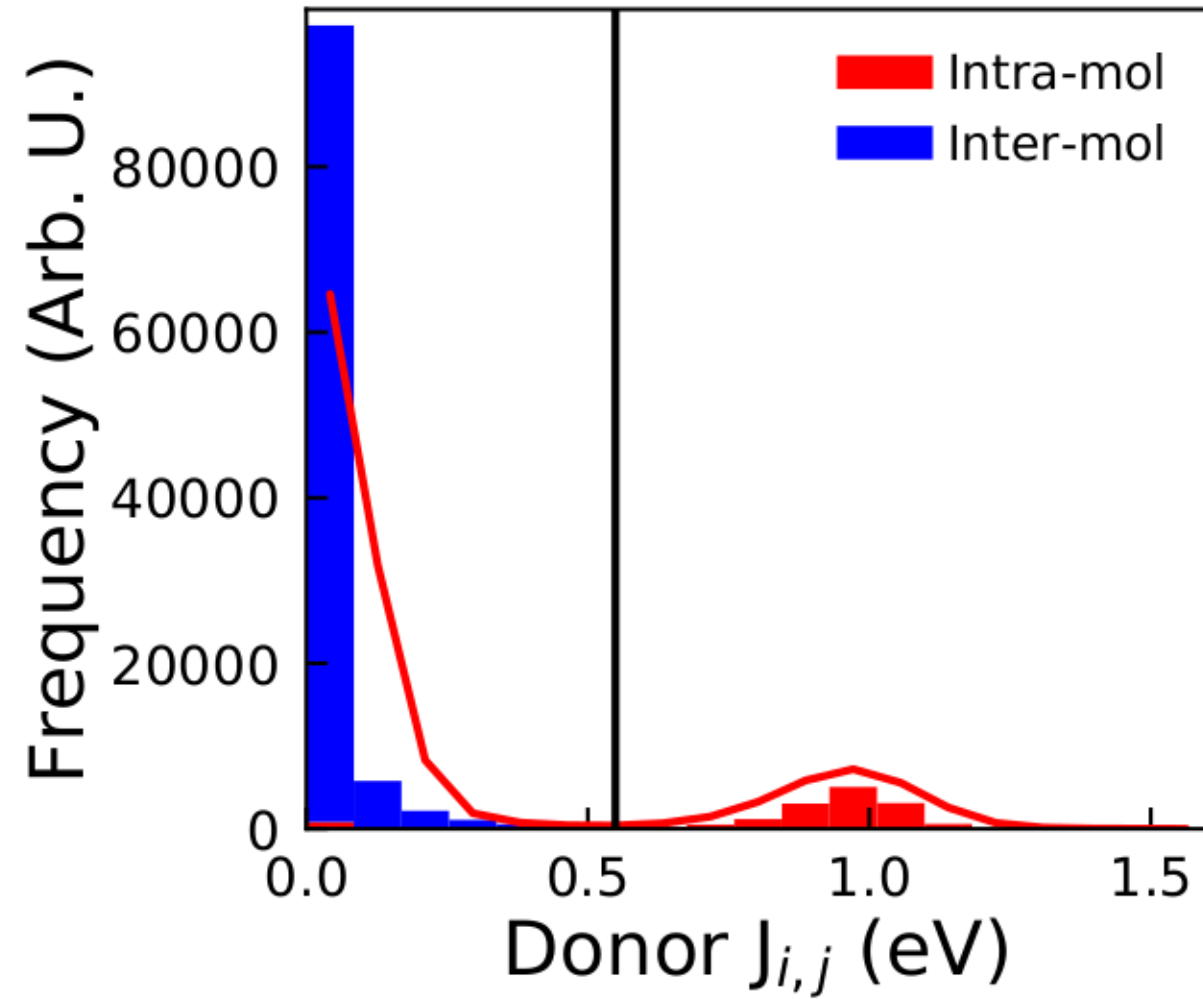**c**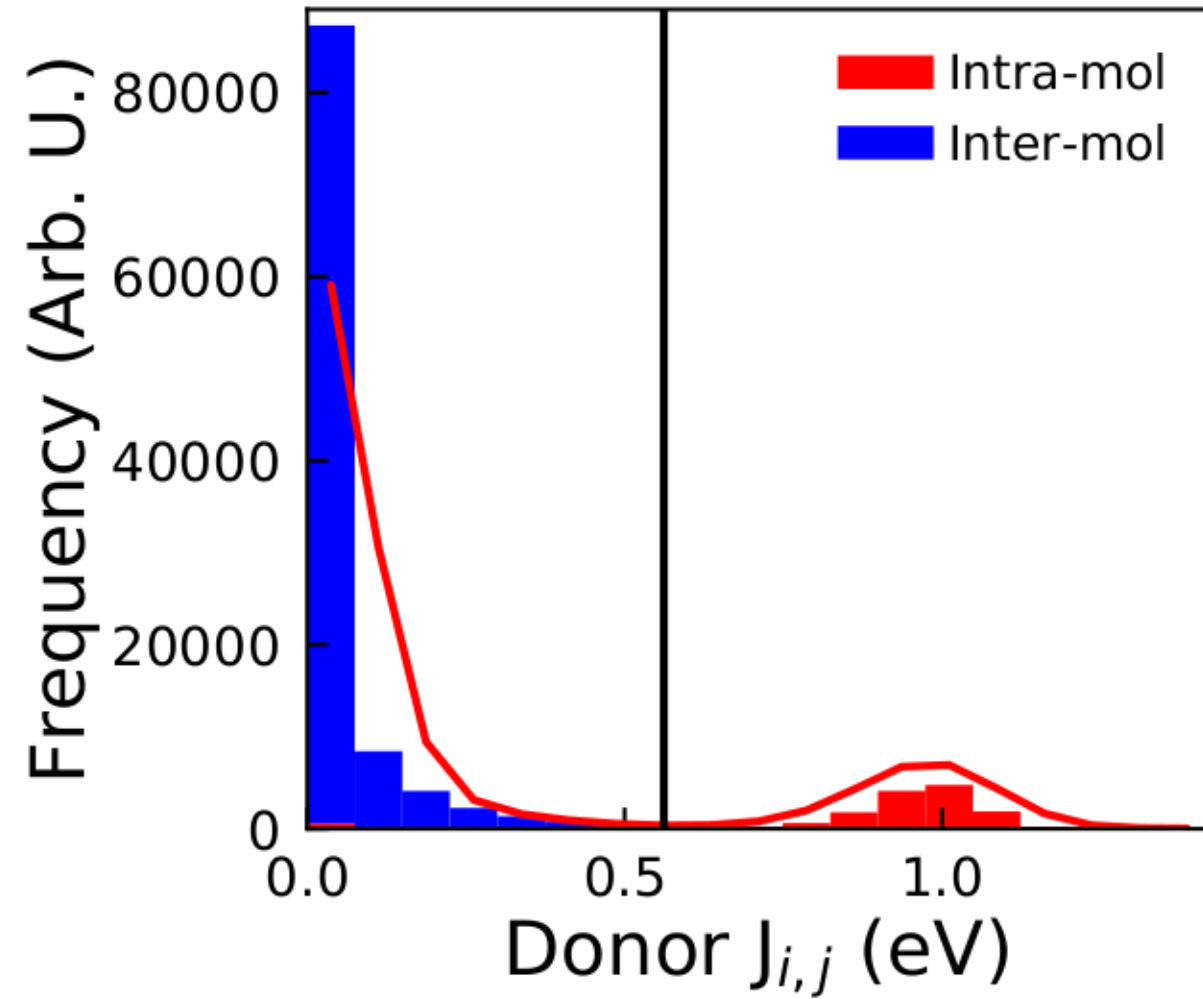

Supplement: Supplementary file 9 [file supplementary]

**a**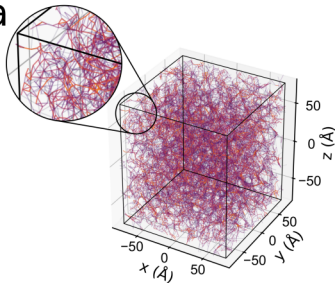**b**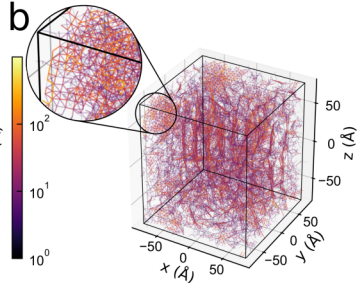**c**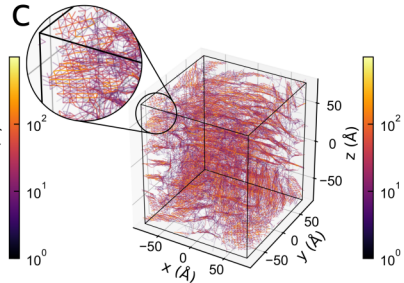

Supplement: Supplementary file 12 [file supplementary]

a

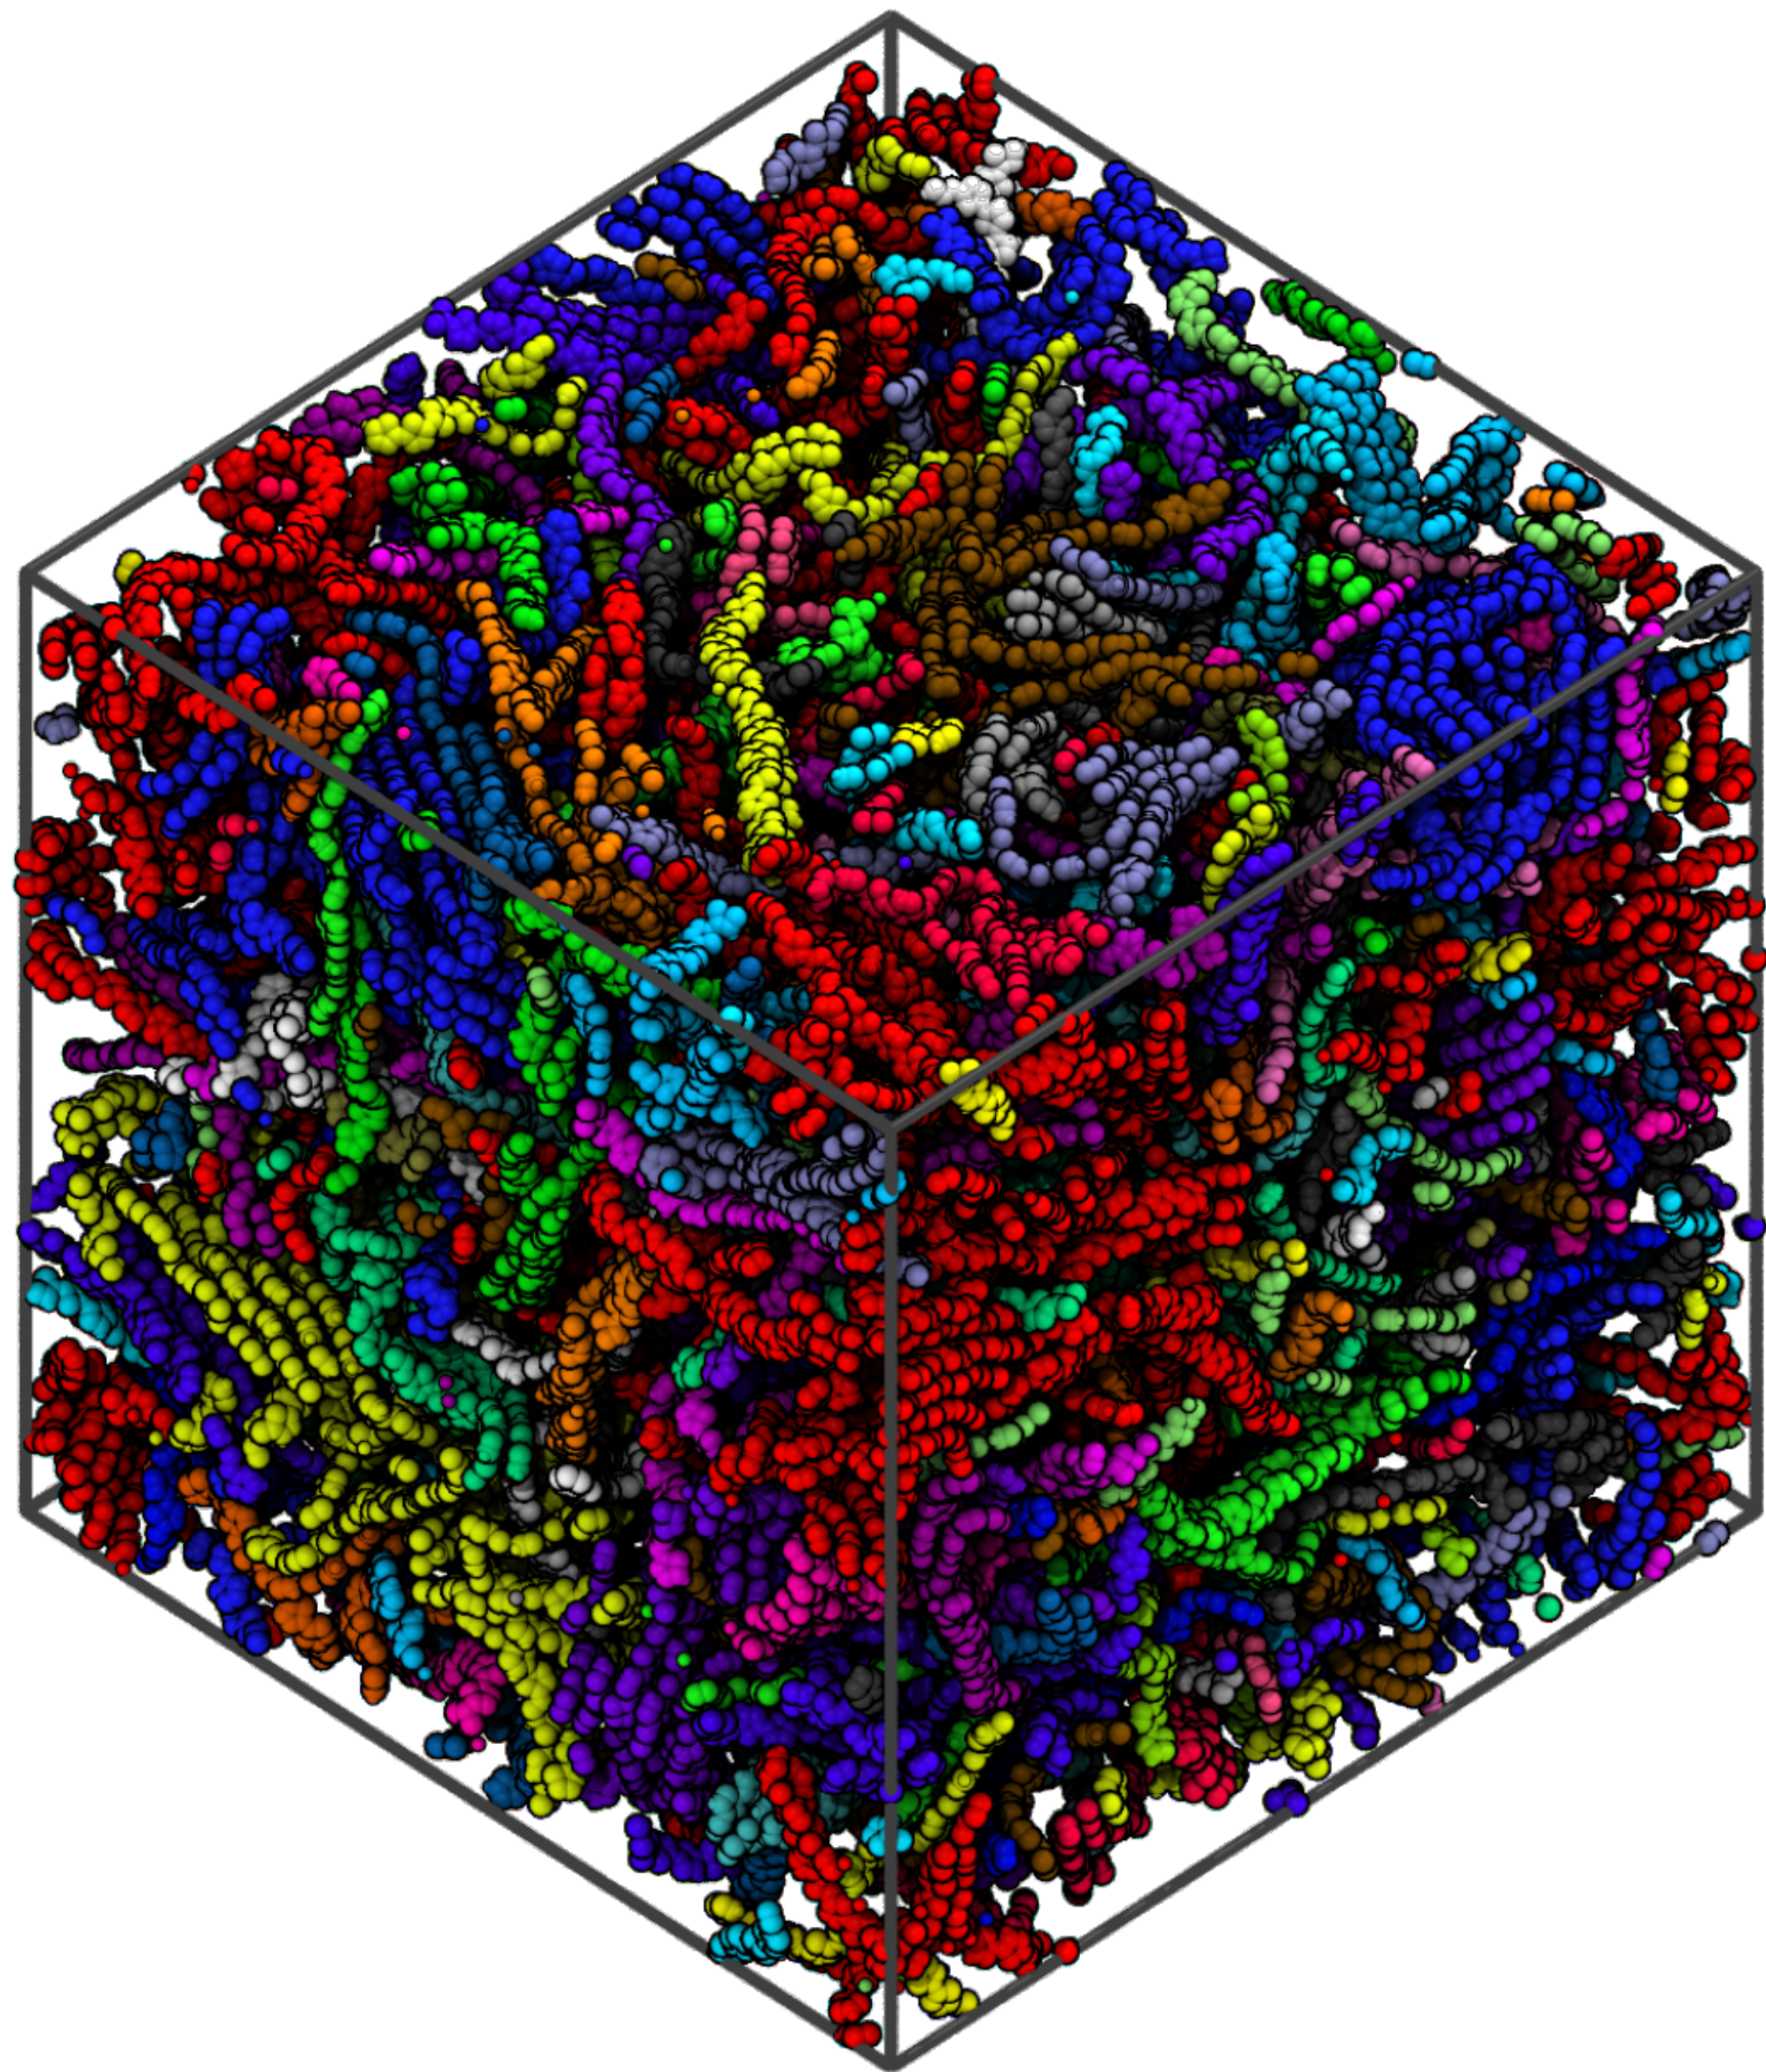

b

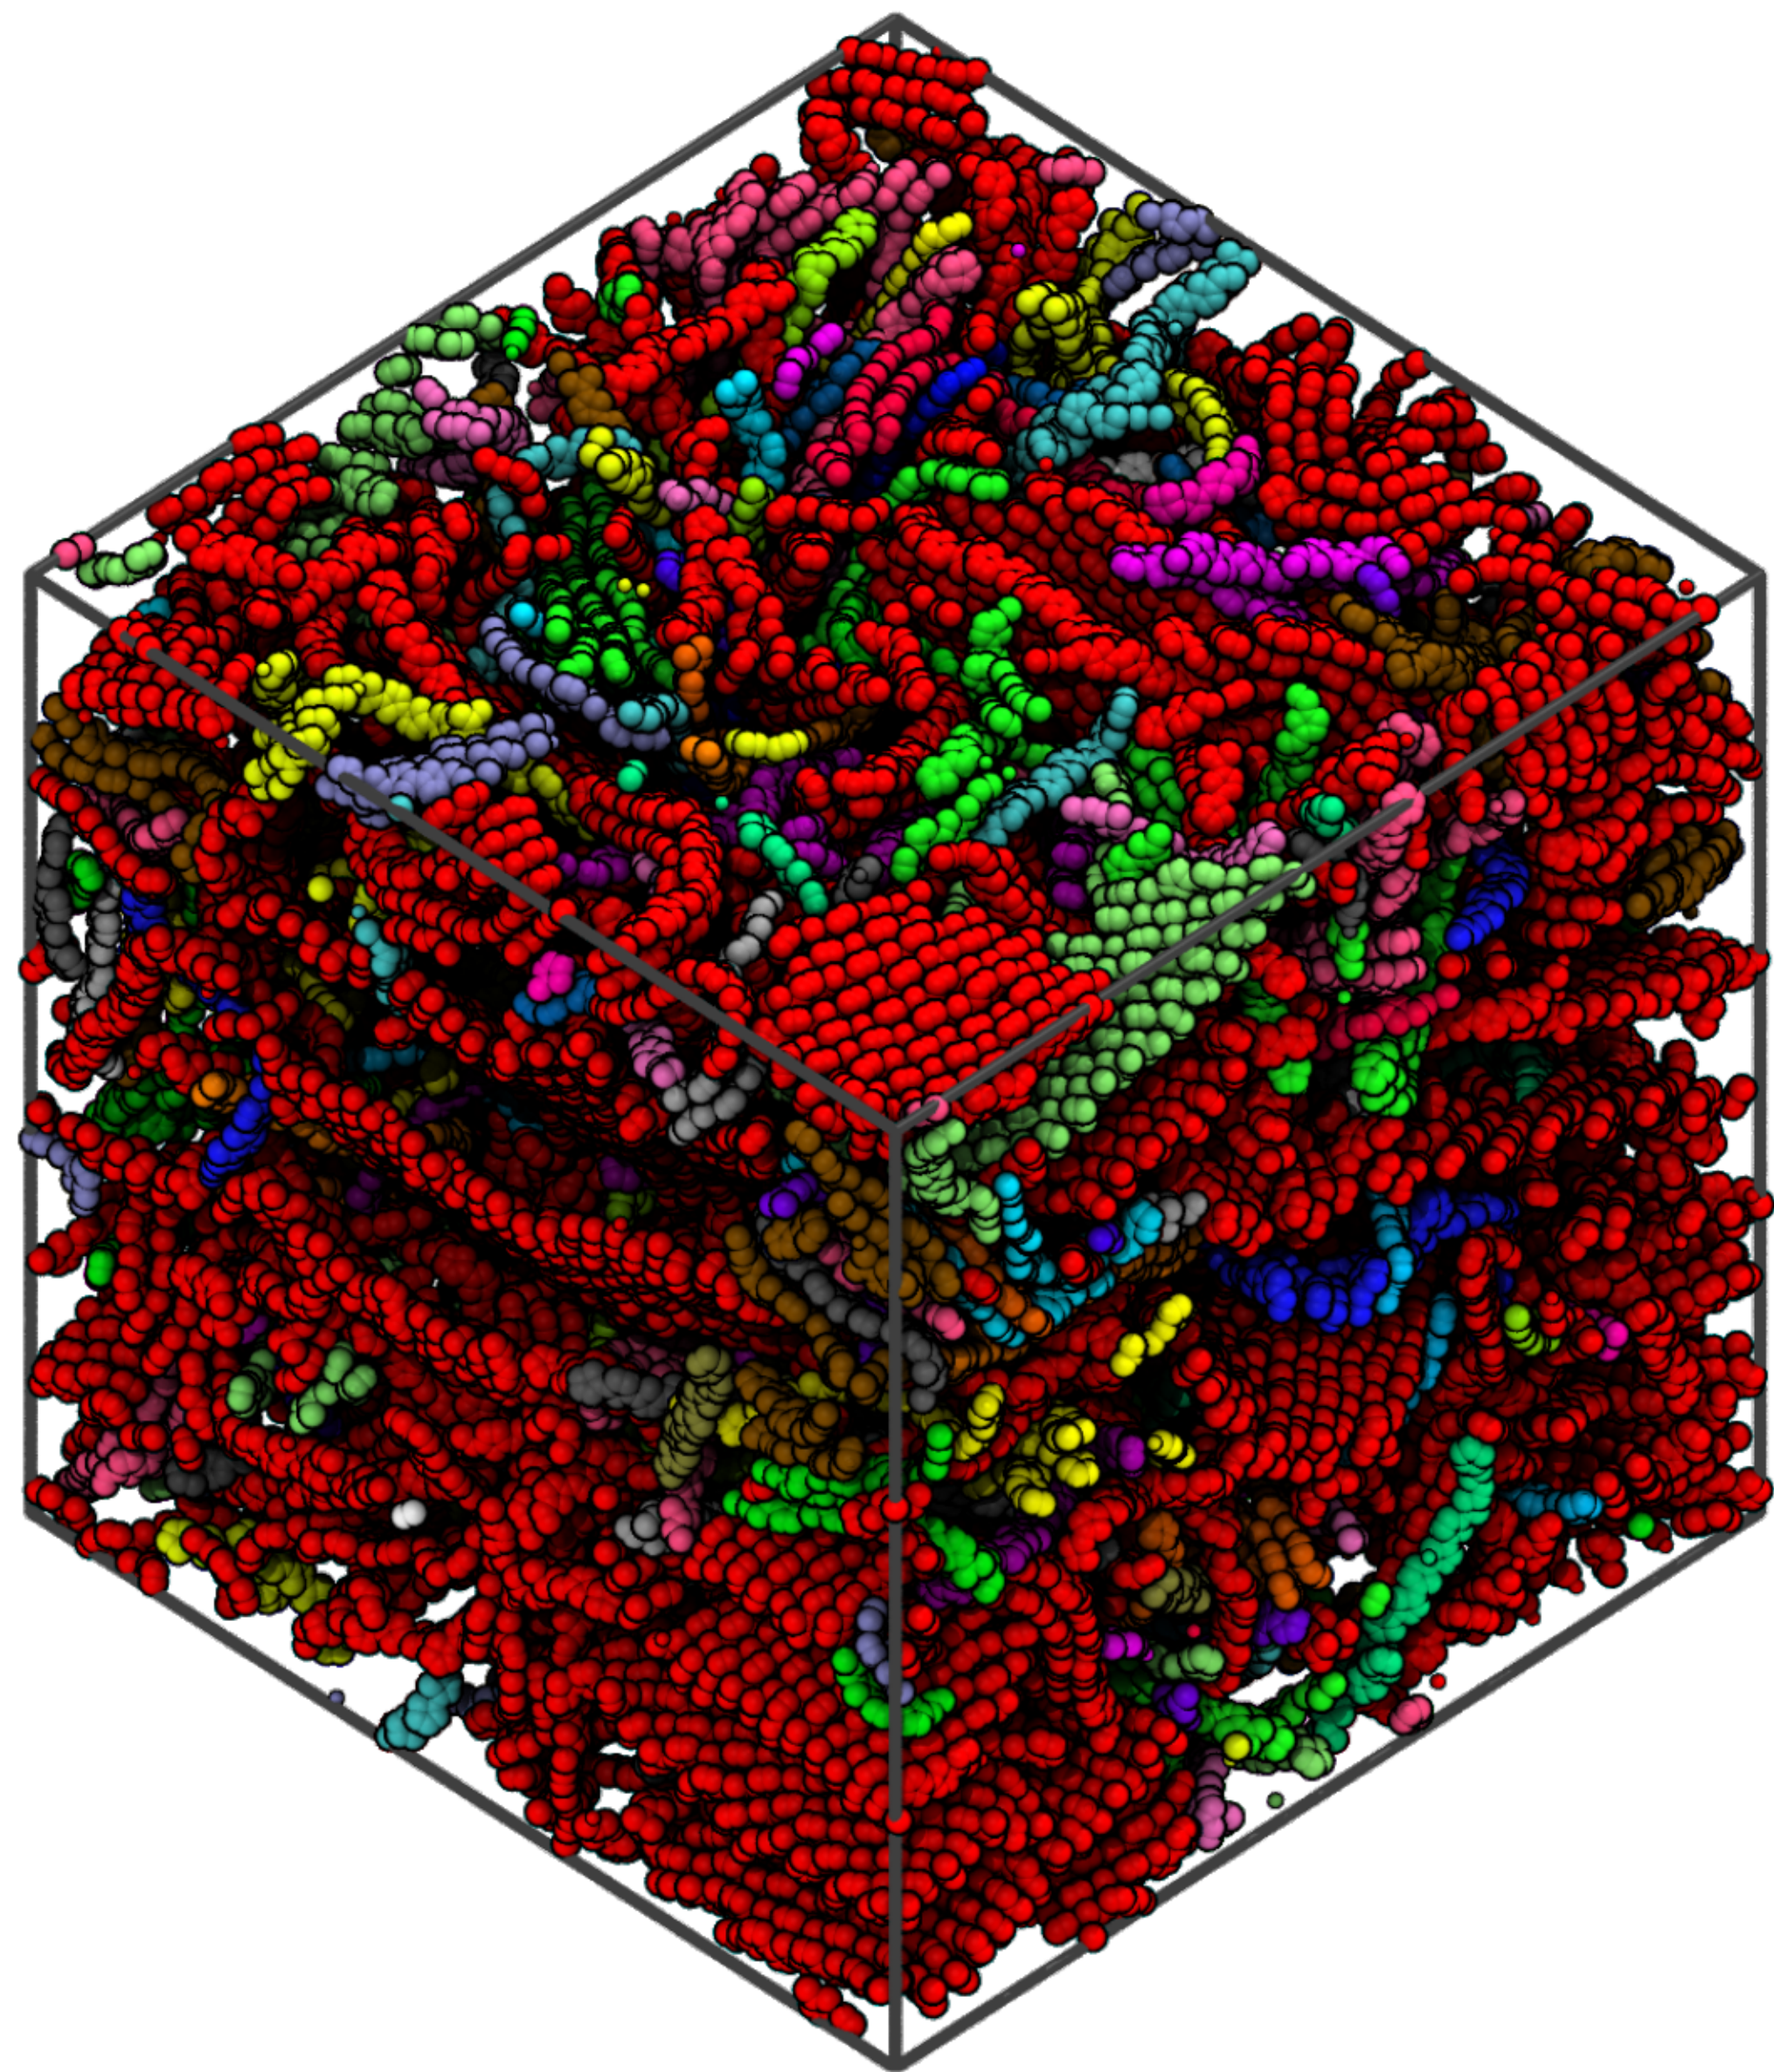

c

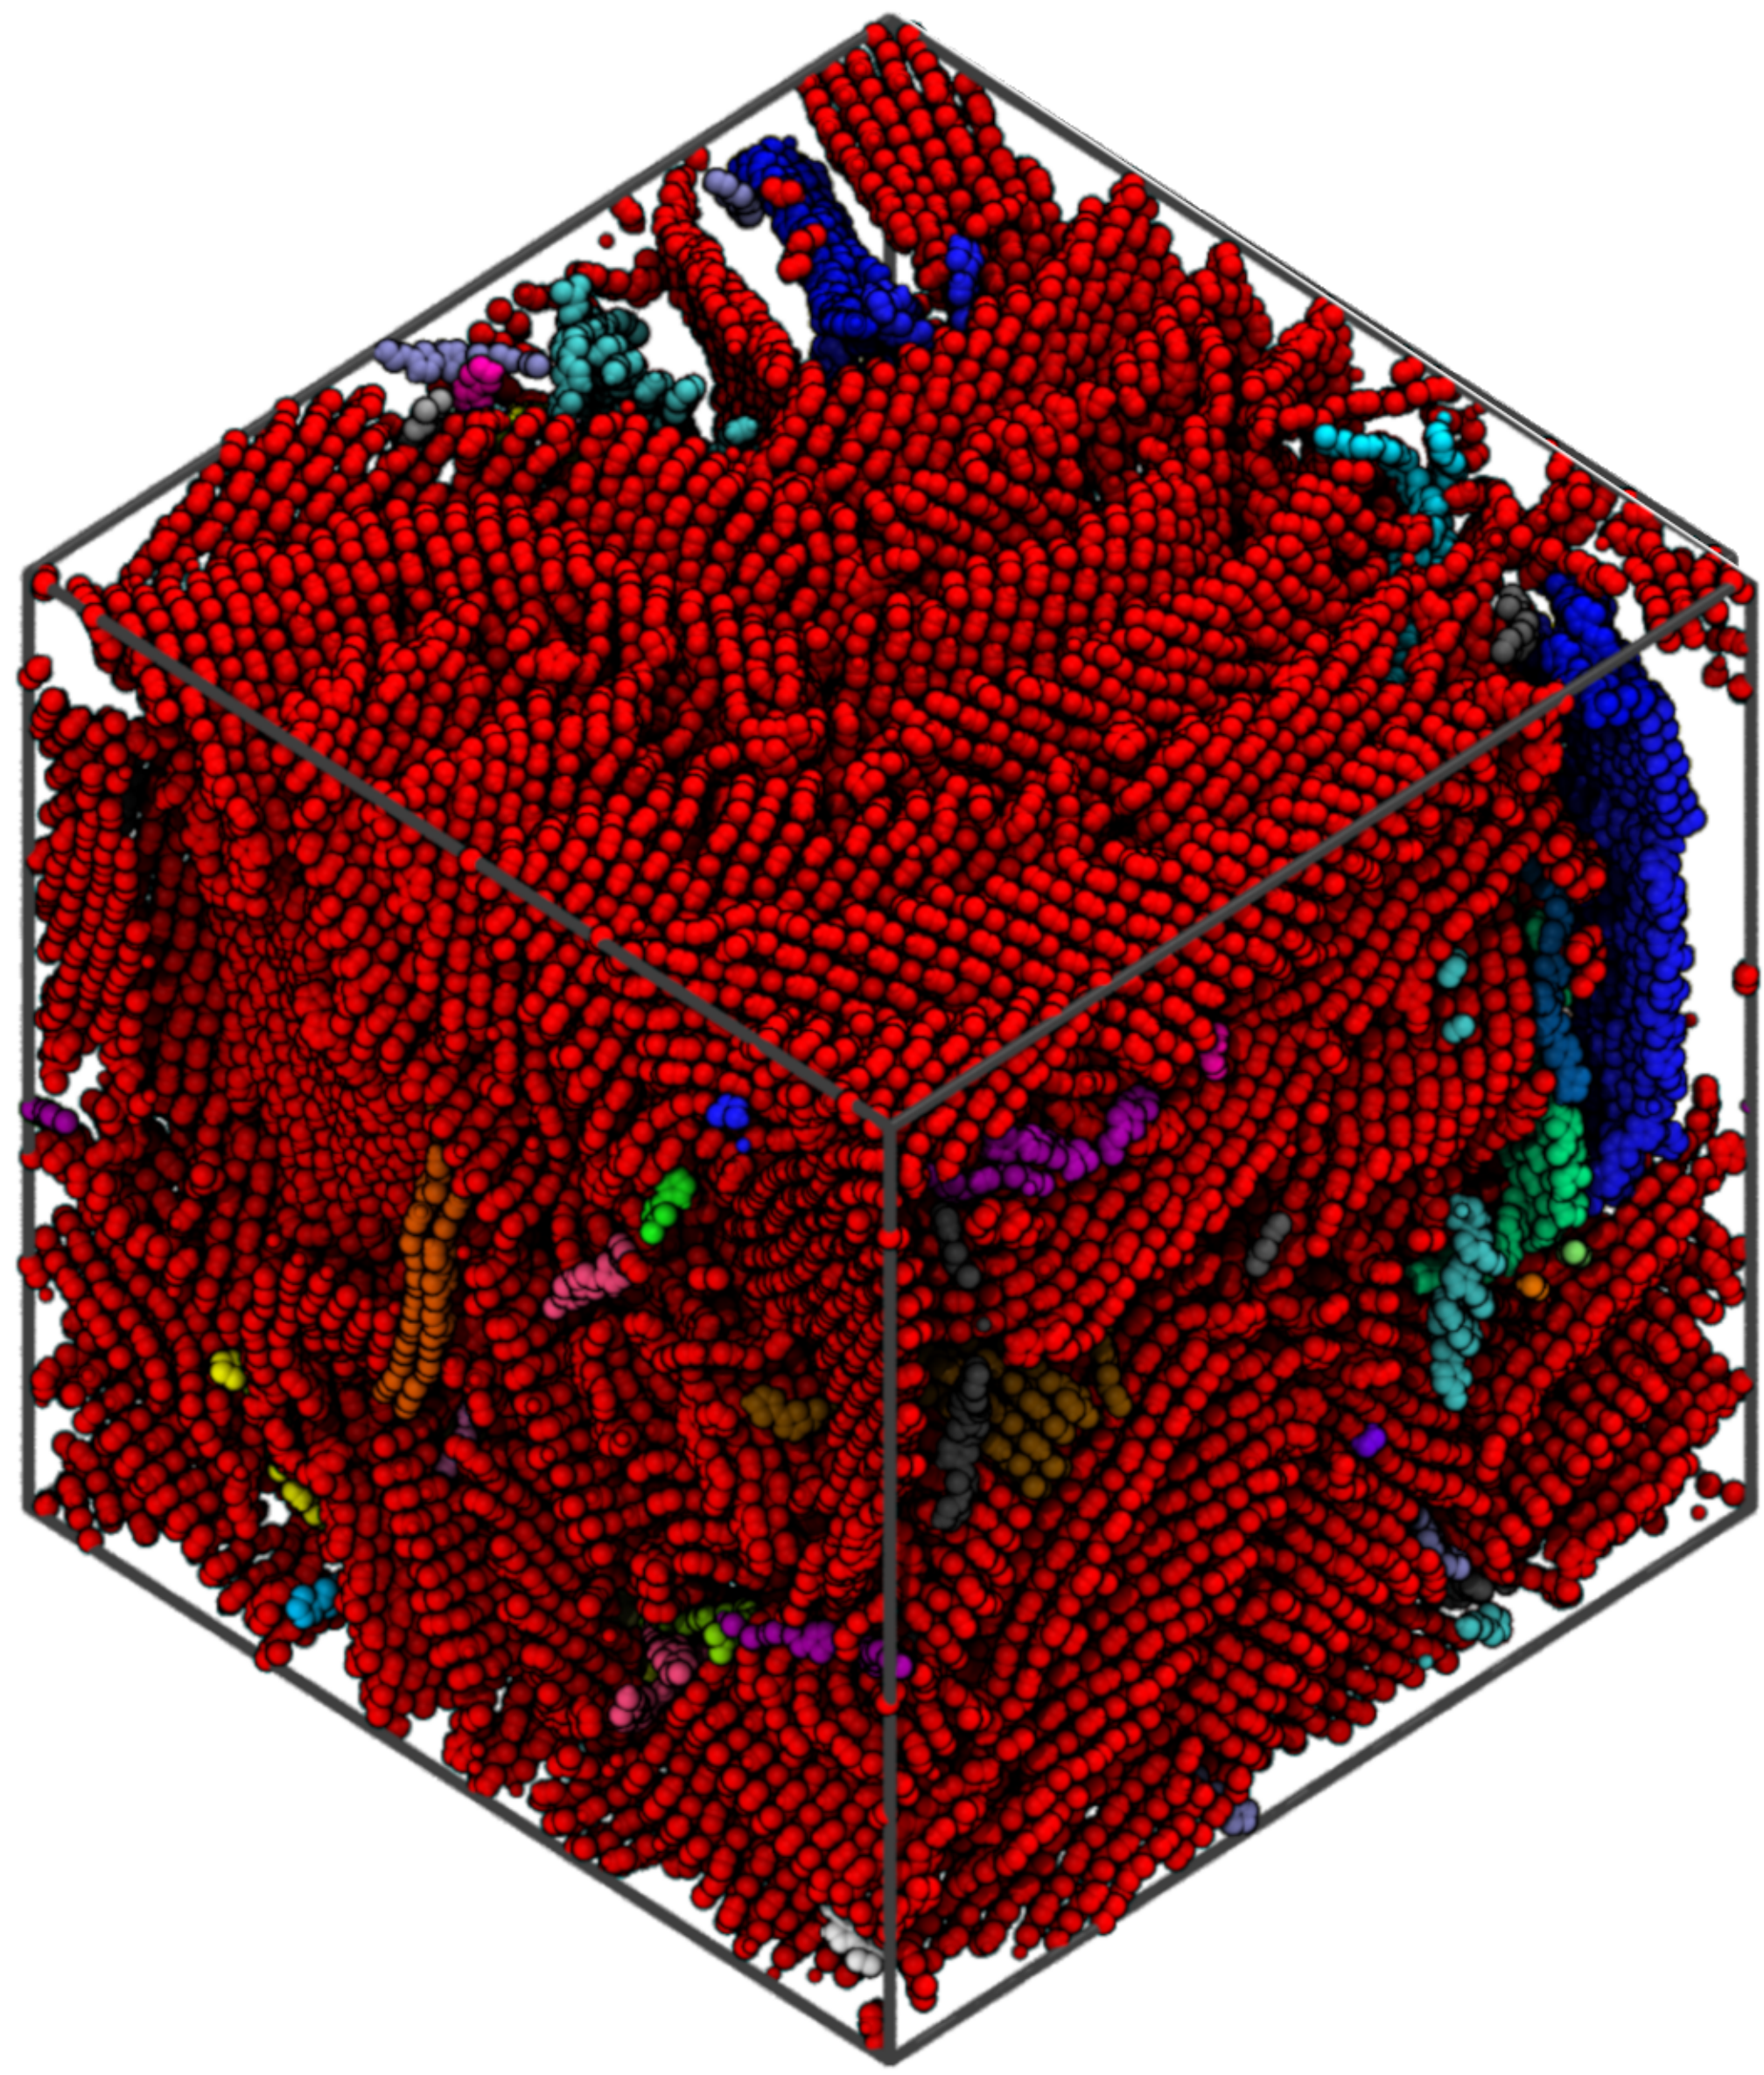

Supplement: Supplementary file 13 [file supplementary]
